# Supplementary material for: Integrated physiological, transcriptomics, and metabolomics offer novel insights into the mechanisms of antimony resistance in Glycine max L
Source: Research Square preprint supplement (doi:10.21203/rs.3.rs-8058106/v1), 2025-11-27
Supplement: Supplementary file 2 [file f726077388705009b36a1fb4.xlsx]

## Sheet: Table S1
Table S1. Sb content in soybean tissues and its bioconcentration factors under different Sb concentrations
Treatment	Antimony contents (mg/kg)					Bioaccumulation factors
	Soils	Roots	Stems	Leaves	Whole plants
Sb0	0.60±0.02b	0.34±0.01c	1.16±0.23a	0.39±0.05bc	0.54±0.07a	0.90
Sb1	10.84±0.71c	17.07±0.88b	28.23±1.58a	9.86±0.55c	15.8±0.10b	1.47
Sb10	90.00±1.01b	142.33±3.38a	90.03±0.67b	57.47±1.60c	90.4±2.17b	1.00
Sb50	424.00±6.24c	500.67±18.49b	454.67±4.84bc	558.00±4.04a	425.33±9.06c	1.00
Note: Different lowercase letters represent significant differences at p < 0.05 level using one-way ANOVA and Tukey’s correction (Mean ± SE, n = 3).

## Sheet: Table S2
Table S2. Transfer coefficient of Sb among different tissues of soybean
Treatment	TFRS	TFSL	TFRL
Sb0	3.41*	0.34	1.59
Sb1	1.65	0.35	0.92
Sb10	0.63	0.64	0.4
Sb50	0.91	1.22	1.12
*: The transfer coefficient was calculated as the ratio of the average Sb concentration in the target tissue to that in the source tissue.

## Sheet: Table S3
Table S3. Correlation coefficient of antimony contents among soybean tissues
Tissues	Soil	Roots	Stems	Leaves
Roots	0.997**
Stems	0.998***	0.991**
Leaves	0.993**	0.982**	0.998**
Whole plants	0.999**	0.996**	0.998**	0.994**
**: indicates statistically significant correlations (p < 0.01)

## Sheet: Table S4
Table S4. Transcriptome sequencing data of Soybean root tissue
Sample	RawDatas	CleanData	Total Clean Bases	GC (%)	Q20 (%)	Q30 (%)	Unmapped(%)	Mapped(%)
Sb0-1	38219426	38207490	5705737985	0.4349	0.977	0.9385	0.0292	0.9708
Sb0-2	41659078	41647108	6210532271	0.4389	0.9786	0.9421	0.0205	0.9795
Sb0-3	46828410	46812896	6982699231	0.441	0.9812	0.9489	0.0167	0.9833
Sb1-1	41650324	41638274	6211087229	0.4314	0.9755	0.9352	0.0349	0.9651
Sb1-2	42173916	42160818	6281435666	0.4343	0.9791	0.9437	0.0224	0.9776
Sb1-3	38055156	38043110	5684270753	0.4308	0.9782	0.9415	0.039	0.961
Sb10-1	43474932	43462058	6486274752	0.4333	0.9761	0.9365	0.0316	0.9684
Sb10-2	39168888	39155940	5824334154	0.4332	0.979	0.9438	0.0361	0.9639
Sb10-3	39782924	39770496	5926152530	0.4357	0.9776	0.9393	0.0381	0.9619
Sb50-1	40258984	40245868	6007227364	0.44	0.9788	0.9434	0.0543	0.9457
Sb50-2	40659202	40646622	6065872068	0.4387	0.9809	0.9491	0.0379	0.9621
Sb50-3	41316666	41302440	6160868307	0.4405	0.9755	0.9378	0.0688	0.9312

## Sheet: Table S5
Table S5. Expression levels and fold-changes of common DEGs across Sb treatments.
ID	Symbol	Mean_Sb0	Mean_Sb1	Mean_Sb10	Mean_Sb50	Sb0-vs-Sb1-log2fc	Sb0-vs-Sb10-log2fc	Sb0-vs-Sb50-log2fc
GmaxZH000402	NPF2.13	10.146	23.6617	22.7023	21.0637	1.22164063138637	1.16192951895785	1.05384553039119
GmaxZH000436	ATHB-13	13.121	2.4607	2.5803	2.4363	-2.41476	-2.34625	-2.42909
GmaxZH000615	RCH2	2.966	0.1243	0.1747	0.3177	-4.57623	-4.08584	-3.22293
GmaxZH001359	PFE	0.7603	3.9813	7.877	6.0667	2.3885477188224	3.37294232979262	2.99620009866129
GmaxZH002115	--	2.337	0.1093	0.1067	0.086	-4.41785	-4.45348	-4.76418
GmaxZH002213	--	4.0347	0.9897	0.8897	0.7837	-2.02743	-2.18111	-2.36414
GmaxZH002311	CSA	3.8273	18.2697	22.69	35.0357	2.25503885197602	2.56764514900959	3.19441288842275
GmaxZH002615	IQD31	4.129	0.3997	0.347	0.635	-3.36892	-3.57278	-2.70096
GmaxZH002622	--	1.9793	0.2377	0.276	0.528	-3.058	-2.84227	-1.9064
GmaxZH002728	PRP1	4.9777	0.035	0.2663	0.1313	-7.15197	-4.22416	-5.24416
GmaxZH002730	At4g02290	4.899	0.3607	0.346	0.3037	-3.76375	-3.82364	-4.01193
GmaxZH002848	ZFP5	3.0583	6.7817	13.3257	26.1467	1.14889421734314	2.12339014869602	3.09580947246158
GmaxZH002971	IDH1	10.7073	3.9477	4.5117	4.801	-1.43953	-1.24687	-1.15719
GmaxZH003327	CESA2	76.0637	25.4087	26.969	26.6317	-1.58189	-1.49591	-1.51406
GmaxZH003339	GT-2	8.7913	2.6287	2.3217	2.626	-1.74175	-1.92092	-1.74322
GmaxZH003920	AUX28	15.4253	2.4607	2.3713	1.486	-2.64818	-2.70153	-3.3758
GmaxZH004104	AVT1C	2.1763	0.2557	0.477	0.2273	-3.08956	-2.18984	-3.25902
GmaxZH004769	WAV3	1.534	0.369	0.3967	0.2337	-2.05561	-1.9513	-2.71477
GmaxZH005310	TGD2	3.6167	0.726	0.7453	0.1907	-2.31662	-2.2787	-4.24554
GmaxZH005472	VTC2	58.269	145.279	161.613	124.593	1.31802	1.47174577063416	1.09642641876145
GmaxZH005749	At5g51310	19.807	7.9903	8.046	5.669	-1.30968	-1.29967	-1.80484
GmaxZH005782	ROPGEF3	4.623	0.5647	0.767	1.045	-3.03336	-2.59153	-2.14533
GmaxZH005788	SDR1	2.3533	0.0617	0.138	0.1177	-5.25407	-4.09197	-4.32193
GmaxZH005957	--	30.6353	0.1437	1.1377	1.0247	-7.73633	-4.75105	-4.90197
GmaxZH006044	PNC1	7.7287	0.0847	0.3357	0.104	-6.51228	-4.52512	-6.21556
GmaxZH006133	PFE	0.4123	2.5593	5.8967	2.994	2.63388505987058	3.83801664260145	2.8601912218032
GmaxZH006295	LAX4	2.805	0.2983	0.259	0.1617	-3.233	-3.43698	-4.11691
GmaxZH006524	SQD2	45.834	92.4777	95.585	22.4067	1.01268679989571	1.06036603885477	-1.03249
GmaxZH006544	IP5P9	14.3577	3.4277	4.8133	1.832	-2.06652	-1.57671	-2.97033
GmaxZH006909	AS	2.019	0.025	0.0503	0.1447	-6.33557	-5.32598	-3.80284
GmaxZH007058	GNS1	159.777	0.259	1.3567	2.591	-9.26889	-6.87985	-5.94641
GmaxZH007525	SAMS3	10.1497	2.3867	2.0663	1.961	-2.08836	-2.29629	-2.37177
GmaxZH007543	AQP1	1251.31	438.76	513.276	426.252	-1.51193	-1.28563	-1.55366
GmaxZH007692	NHL1	86.2393	16.652	18.6617	17.344	-2.37265	-2.20827	-2.31391
GmaxZH007752	PER3	31.7117	0.116	0.4907	0.686	-8.09475	-6.01413	-5.53066
GmaxZH007833	PME7	1.8813	0	0.0613	0.098	-10.8775	-4.93894	-4.26283
GmaxZH007900	SDR3b	5.932	0.3893	0.2753	0.5703	-3.92944	-4.42927	-3.37864
GmaxZH007928	EXPA17	4.352	0.08	0.0273	0.3747	-5.76553	-7.31487	-3.538
GmaxZH007944	NPF4.6	3.0553	0.8577	0.6057	0.503	-1.83284	-2.33473	-2.6027
GmaxZH008094	EMB3004	4.4877	0.8903	0.813	0.6937	-2.33355	-2.46464	-2.69365
GmaxZH008110	HSR201	1.3893	0.2737	0.206	0.036	-2.3439	-2.75368	-5.27025
GmaxZH008510	ODC	14.01	1.1257	0.7077	0.8653	-3.63761	-4.30724	-4.01706
GmaxZH008605	CYP85A2	6.276	16.0707	13.5357	17.8933	1.35651252080061	1.10884868835426	1.51150491339829
GmaxZH008872	At3g50280	7.23	20.626	29.034	22.782	1.51239651422422	2.00567579275948	1.65582685250177
GmaxZH009155	TUBA1	118.607	37.1227	28.5613	30.8577	-1.67582	-2.05406	-1.94249
GmaxZH010165	--	5.447	0.279	0.3977	0.593	-4.28712	-3.77583	-3.19936
GmaxZH010765	At5g09300	4.9477	0.6537	0.6853	0.4157	-2.92012	-2.85187	-3.57325
GmaxZH011084	CYP78A5	3.6453	0.8167	1.487	0.228	-2.15823	-1.29365	-3.99895
GmaxZH011439	INVA	13.321	0.8137	0.6947	0.2317	-4.03312	-4.26124	-5.84551
GmaxZH011453	EARLI1	34.258	0.7553	0.7803	1.7847	-5.50318	-5.45621	-4.26271
GmaxZH011607	MYB315	5.399	0.17	0.21	0.5223	-4.98909	-4.68423	-3.36965
GmaxZH011781	--	3.5427	0.202	0.1547	0.118	-4.13241	-4.5176	-4.90798
GmaxZH011990	GH3.1	0.1723	1.0003	1.677	2.8377	2.53720713328335	3.28260900397057	4.0414314447801
GmaxZH012242	--	8.6237	28.818	29.9177	40.0853	1.74059689507909	1.79462434186822	2.21670115181942
GmaxZH012531	IQM2	4.1593	0.6047	0.7197	0.862	-2.78214	-2.53095	-2.27059
GmaxZH012895	DOGL2	1.1117	0.192	0.162	0.08	-2.53355	-2.77866	-3.79658
GmaxZH013014	TUBB1	37.1763	6.0157	6.414	4.0603	-2.62759	-2.53509	-3.19471
GmaxZH013091	--	69.512	17.862	27.4187	29.6573	-1.96037	-1.3421	-1.22887
GmaxZH013245	ALDH2C4	8.127	0.5637	1.095	1.1773	-3.84981	-2.89179	-2.7872
GmaxZH013250	NAKR2	2.5987	0.1463	0.2703	0.4223	-4.15044	-3.26496	-2.62132
GmaxZH013631	PR5K	59.7727	19.7107	18.3363	8.0353	-1.60051	-1.70478	-2.89506
GmaxZH013874	XYN1	3.7753	0.3673	0.7373	1.409	-3.36144	-2.35622	-1.42193
GmaxZH013928	--	34.363	9.1303	8.536	10.9767	-1.91212	-2.00922	-1.64642
GmaxZH014104	RZPF34	127.244	25.7407	27.1567	22.4053	-2.30548	-2.22822	-2.50569
GmaxZH014192	mtnN	3.5087	17.917	15.403	37.2627	2.35233429534706	2.13421656881558	3.40873612382583
GmaxZH014220	--	20.9223	3.1027	1.9573	3.7267	-2.75346	-3.41808	-2.48909
GmaxZH014353	ARP1	11.557	0.3243	0.511	0.4983	-5.15515	-4.4993	-4.53551
GmaxZH014430	LAX3	8.6037	2.955	2.1197	2.7023	-1.54179	-2.02111	-1.67075
GmaxZH014584	SWEET3B	22.758	4.541	4.237	3.0477	-2.32529	-2.42526	-2.9006
GmaxZH015007	PAP27	13.1057	34.835	62.7143	33.9027	1.41034681990933	2.25860446464786	1.37120801185131
GmaxZH015153	GASA3	4.6597	0.3917	0.386	0.1743	-3.57253	-3.59355	-4.74031
GmaxZH015245	EXPA15	0.6943	2.2667	2.296	2.367	1.70687190698442	1.7254223033562	1.76935936741512
GmaxZH015263	--	10.9593	2.7413	2.814	2.88	-1.99921	-1.96147	-1.92802
GmaxZH015887	--	44.6403	1.9103	1.9933	4.0347	-4.54645	-4.48509	-3.46783
GmaxZH016030	Os04g0338000	9.299	27.5277	36.8953	120.236	1.56573484316275	1.98829086559653	3.69265352973027
GmaxZH016131	CNGC4	1.4823	0.2647	0.348	0.28	-2.48562	-2.09071	-2.40437
GmaxZH016355	OMT3	10.8137	24.5113	31.9907	36.4327	1.18059317318379	1.56479526681377	1.75237680525442
GmaxZH016360	MLO6	1.555	3.5903	5.5613	12.0263	1.20720321244524	1.8385162311501	2.95121036584502
GmaxZH016708	SAT	1.6423	4.717	4.178	5.2953	1.52212262993857	1.34706552147608	1.68897453164764
GmaxZH017089	ABP19A	50.581	3.1747	7.4393	4.5063	-3.99392	-2.76535	-3.48857
GmaxZH017205	ENDO2	9.8313	23.5937	23.7497	33.711	1.26294064929531	1.2724482705409	1.77776042952059
GmaxZH017415	ROPGEF3	4.9303	0.992	1.0473	1.142	-2.31327	-2.23496	-2.11012
GmaxZH017526	--	3.4487	8.23	11.311	23.615	1.25485373982639	1.71361588699892	2.77559293955533
GmaxZH017572	NAKR2	15.486	4.013	5.007	3.1173	-1.94821	-1.62895	-2.31258
GmaxZH017685	At3g18200	2.2963	0.0853	0.087	0.103	-4.75008	-4.72217	-4.47862
GmaxZH017686	DTX16	5.864	0.8043	0.5137	0.203	-2.86602	-3.51298	-4.85233
GmaxZH017759	IP5P9	21.744	5.676	5.4853	5.9783	-1.93767	-1.98697	-1.8628
GmaxZH018191	CAX3	37.7207	8.5077	9.5333	13.8603	-2.14852	-1.9843	-1.44439
GmaxZH018668	BCAT7	5.8383	0.17	0.5397	0.827	-5.10195	-3.43542	-2.8196
GmaxZH018779	SMG7L	3.6237	7.7387	7.5983	9.1027	1.09463476762184	1.06823275230722	1.32883900009532
GmaxZH018844	DSEL	1.3553	5.3283	8.065	5.6607	1.97503662382315	2.57302681891943	2.06232425733339
GmaxZH018892	PER10	12.1113	29.9117	25.7687	66.498	1.3043505994417	1.08926	2.45695325096377
GmaxZH018950	LRX2	270.873	53.169	61.215	73.5467	-2.34896	-2.14566	-1.88088
GmaxZH019399	Bp10	8.107	0.2867	0.459	0.8593	-4.82172	-4.1426	-3.23788
GmaxZH019434	--	229.88	5.1467	5.0427	12.5557	-5.4811	-5.51055	-4.19447
GmaxZH019653	TUBB1	15.7007	1	0.8503	0.8093	-3.97275	-4.20665	-4.27795
GmaxZH019892	NAKR2	5.779	1.0673	0.838	0.8907	-2.43681	-2.7858	-2.69786
GmaxZH021065	guaA	3.967	0.206	0.4257	0.6797	-4.26733	-3.22025	-2.54515
GmaxZH021190	PARC	17.2043	93.555	175.684	110.325	2.4430427708086	3.35213891338691	2.68092021228919
GmaxZH021363	HTH	0.5697	0.0423	0.049	0.0343	-3.75025	-3.53926	-4.05244
GmaxZH021431	VSPB	111.228	490.882	382.519	445.984	2.14186155827168	1.78201572198246	2.00347626601521
GmaxZH021459	TIP2-1	41.4207	4.9957	7.3457	9.3677	-3.0516	-2.49539	-2.14459
GmaxZH021593	NIP6-1	3.6927	0.2287	0.2263	0.1197	-4.01335	-4.02814	-4.94757
GmaxZH021714	--	191.853	13.9617	19.224	10.0093	-3.78046	-3.31902	-4.26058
GmaxZH022016	RIC4	19.7243	7.7167	6.8587	6.6223	-1.35393	-1.52398	-1.57457
GmaxZH022462	DNAJB1	47.636	6.153	5.5067	6.7853	-2.95269	-3.1128	-2.81156
GmaxZH022606	SHT	3.5933	0.65	0.7133	0.5167	-2.46681	-2.33267	-2.79802
GmaxZH022724	--	10.487	0.178	0.1083	0.3157	-5.88058	-6.59698	-5.05406
GmaxZH023031	At5g48900	17.152	0.53	0.814	0.4077	-5.01624	-4.3972	-5.39484
GmaxZH023057	--	0.878	3.0007	2.8383	5.0083	1.77299021912904	1.69275118430939	2.51203774022939
GmaxZH023066	N3	5.7863	0.6147	0.3683	0.6243	-3.23477	-3.97357	-3.21226
GmaxZH023357	PER54	132.983	7.1473	19.3827	11.7153	-4.2177	-2.77841	-3.50478
GmaxZH023598	CYP81E1	3.0707	0	0.1353	0.0823	-11.5843	-4.50396	-5.22093
GmaxZH023793	RIPK	11.8483	27.6333	32.3983	37.8847	1.22172546684198	1.45123546433532	1.67692992004277
GmaxZH023818	PMEI3	2.5577	0.2957	0.2143	0.2107	-3.11278	-3.5769	-3.60179
GmaxZH024563	LAF1	9.961	1.761	1.963	1.3427	-2.4999	-2.34323	-2.89119
GmaxZH024641	BAG1	8.4713	3.1607	2.906	3.0497	-1.42236	-1.54355	-1.47394
GmaxZH024918	GALM	24.0817	11.3377	11.0673	11.39	-1.08681	-1.12163	-1.08017
GmaxZH024948	At3g18200	2.978	0.1287	0.0783	0.075	-4.53263	-5.24857	-5.31131
GmaxZH025241	--	2.3393	0.3187	0.3313	0.041	-2.87598	-2.81974	-5.83433
GmaxZH025513	--	53.8023	5.049	3.7863	3.4927	-3.4136	-3.8288	-3.94527
GmaxZH025569	Glyma18g48580	12.341	2.4583	2.6093	3.1957	-2.32771	-2.24171	-1.94927
GmaxZH025585	CYCU4-1	5.8403	0.6747	0.998	0.847	-3.1138	-2.54894	-2.78562
GmaxZH026014	IQD31	2.784	0.1027	0.222	0.1327	-4.76112	-3.64853	-4.39128
GmaxZH026173	GSTF13	1.7863	0.0213	0.0897	0.0227	-6.38775	-4.31629	-6.30029
GmaxZH026290	AUX28	15.5483	1.2797	1.457	1.32	-3.60292	-3.41569	-3.55815
GmaxZH026370	MIK1	3.7297	0.1403	0.2313	0.2007	-4.73212	-4.011	-4.21617
GmaxZH026387	--	1.012	0.292	0.2003	0.3053	-1.79317	-2.33673	-1.72875
GmaxZH026716	POPTRDRAFT_576556	10.2	0.579	0.7413	0.7583	-4.13886	-3.7823	-3.74959
GmaxZH027150	--	1.6503	0.1617	0.1313	0.2943	-3.35166	-3.65145	-2.48723
GmaxZH027185	APS1	14.621	0.4653	0.9357	1.1417	-4.97363	-3.9659	-3.67883
GmaxZH027603	NPF4.6	2.564	0.1783	0.1197	0.1973	-3.84575	-4.4213	-3.69969
GmaxZH027604	PAE12	8.0903	3.2597	2.7823	3.3853	-1.31147	-1.5399	-1.2569
GmaxZH027606	MYB61	8.306	1.113	1.368	1.3767	-2.8997	-2.60209	-2.59297
GmaxZH027776	HSR201	369.727	171.48	174.121	83.105	-1.10842	-1.08637	-2.15345
GmaxZH027794	--	7.5107	23.736	133.633	355.998	1.66006395596187	4.15318793838668	5.56678300421273
GmaxZH027817	GIF1	4.6617	0.3177	0.3203	0.531	-3.87526	-3.8632	-3.13406
GmaxZH027971	IAA14	72.661	5.4017	5.7623	4.7953	-3.7497	-3.65646	-3.92148
GmaxZH028099	ERF062	2.703	0.4803	0.227	0.7977	-2.49245	-3.5738	-1.7607
GmaxZH028269	PIP2-1	377.287	51.2057	51.0423	91.077	-2.88129	-2.8859	-2.0505
GmaxZH028362	IP5P3	7.325	15.282	16.3677	21.859	1.06093270079838	1.15994800485165	1.57732673782431
GmaxZH028571	--	9.288	0.7617	0.8517	1.6597	-3.60814	-3.44701	-2.48447
GmaxZH028597	--	4.7933	0.1913	0.329	0.266	-4.64687	-3.86487	-4.17153
GmaxZH028630	AO1	2.3493	0.16	0.252	0.64	-3.87611	-3.22076	-1.87611
GmaxZH028660	XTH8	12.2343	0.7647	1.0067	1.724	-3.99996	-3.60328	-2.8271
GmaxZH029328	PIP1-3	59.937	14.7593	15.9917	24.418	-2.02182	-1.90613	-1.2955
GmaxZH029437	TIP2-2	841.131	263.656	329.215	313.366	-1.67367	-1.3533	-1.42448
GmaxZH029710	NFP	9.0317	0.4167	0.4657	0.2503	-4.43803	-4.27762	-5.17307
GmaxZH030629	NEK5	5.4877	0.8943	0.902	0.9433	-2.61731	-2.60499	-2.54035
GmaxZH030764	SCPL48	5.103	0.7033	0.67	0.5763	-2.85907	-2.92911	-3.14637
GmaxZH030823	--	16.3057	0.283	0.313	0.428	-5.84843	-5.70307	-5.25162
GmaxZH031402	SUS6	3.7467	1.553	1.7713	1.6117	-1.27055	-1.08077	-1.21705
GmaxZH031430	MYB20	10.7657	5.188	3.9973	4.738	-1.05319	-1.42933	-1.18409
GmaxZH031544	TRG-31	873.205	246.034	297.181	231.638	-1.82746	-1.55498	-1.91445
GmaxZH031616	At3g56230	12.2043	2.7537	2.0227	1.851	-2.14797	-2.59306	-2.72102
GmaxZH031628	AGT2	101.974	49.4543	47.9507	46.3603	-1.04403	-1.08858	-1.13724
GmaxZH031648	PAT	55.3747	15.0137	17.8273	13.9573	-1.88295	-1.63514	-1.9882
GmaxZH031714	At1g67750	8.5473	0.4923	0.9567	0.9263	-4.11777	-3.15939	-3.20587
GmaxZH031860	BRN2	2.367	0.073	0.0857	0.207	-5.01902	-4.78818	-3.51536
GmaxZH031871	PME33	1.9903	0.0707	0.113	0.212	-4.81584	-4.13862	-3.23087
GmaxZH032577	XTH32	113.878	7.0293	9.8583	5.5713	-4.01795	-3.53	-4.35332
GmaxZH032589	ZAT5	8.5143	3.6613	3.6697	3.7033	-1.21752	-1.21424	-1.20107
GmaxZH032721	FLA18	54.1373	16.4443	16.95	19.885	-1.71903	-1.67534	-1.44494
GmaxZH032982	BZIP61	2.4943	0.126	0.0397	0.1583	-4.30716	-5.97458	-3.97762
GmaxZH033229	At4g27290	3.879	0.9383	1.1327	0.7357	-2.04751	-1.77596	-2.39856
GmaxZH033644	FLA12	28.387	13.468	10.4287	6.1783	-1.07569	-1.44468	-2.19994
GmaxZH033715	GAT1	12.4743	1.183	1.583	0.87	-3.39844	-2.97823	-3.8418
GmaxZH033855	PER3	24.318	4.9887	6.1763	7.045	-2.2853	-1.9772	-1.78735
GmaxZH034091	--	1.6707	0.0417	0	0	-5.32539	-10.7062	-10.7062
GmaxZH034139	GRI	8.34	0.846	0.601	1.018	-3.30132	-3.79461	-3.03431
GmaxZH034163	BZIP34	6.7813	0.116	0.4123	0.1703	-5.86937	-4.03969	-5.31514
GmaxZH034527	UGT85K4	6.3383	17.5337	12.7667	16.927	1.46795228795074	1.01020645318173	1.41715086643117
GmaxZH034531	UGT85K4	4.4557	18.1973	14.83	20.745	2.03001383882595	1.73480538557081	2.21905044498783
GmaxZH034612	ATJ10	1.848	0.1823	0.2417	0.1083	-3.34131	-2.93487	-4.09242
GmaxZH034883	ABCB19	7.8563	1.7143	1.3877	2.2503	-2.19621	-2.5012	-1.80372
GmaxZH035124	TTL1	43.1693	10.932	12.119	13.612	-1.98145	-1.83274	-1.66513
GmaxZH035259	PIN2	4.749	0.2907	0.3237	0.3943	-4.03019	-3.87504	-3.59014
GmaxZH035544	--	2.3197	0.582	0.6473	0.9383	-1.99483	-1.84134	-1.30575
GmaxZH035557	CHX20	1.4083	4.0353	3.5387	5.9623	1.51869900965329	1.32921702931329	2.08188819297545
GmaxZH035730	At2g36630	34.6627	10.9663	12.8133	6.0623	-1.6603	-1.43574	-2.51544
GmaxZH035887	At5g34940	6.2413	2.889	2.0487	2.0203	-1.11128	-1.60717	-1.62726
GmaxZH035938	DYNLL1	4.274	1.098	1.0327	0.7413	-1.96071	-2.04921	-2.52739
GmaxZH036076	PPO	2.332	11.9807	7.3653	12.0733	2.3610684957723	1.6591830303364	2.37218435191587
GmaxZH036103	PME25	3.569	0.02	0.1207	0.0733	-7.47938	-4.88642	-5.60491
GmaxZH036104	PME24	1.273	0.0127	0.011	0.012	-6.65105	-6.85459	-6.72905
GmaxZH036138	CXE15	1.1093	0	0.0157	0.051	-10.1155	-6.14585	-4.44305
GmaxZH036342	RBK2	2.239	0.3117	0.1623	0.076	-2.84478	-3.78582	-4.88071
GmaxZH036348	At5g18840	3.061	0.013	0.012	0.0237	-7.87935	-7.99482	-7.015
GmaxZH036437	SCPL12	14.4213	29.697	32.5877	33.0693	1.04211264088222	1.17612150030111	1.19728940556255
GmaxZH036500	--	2.6137	0.574	0.838	1.0383	-2.18695	-1.64105	-1.33181
GmaxZH036724	At4g27290	1.502	4.3043	3.72	4.4577	1.51890499360317	1.30841780848112	1.56940392659727
GmaxZH036787	--	5.267	12.701	14.399	19.381	1.26988872595552	1.45091525642858	1.87958964669652
GmaxZH036935	BZIP34	8.7833	0.5147	0.698	0.5643	-4.09306	-3.65347	-3.96015
GmaxZH037018	--	3.259	0.022	0.0493	0	-7.21078	-6.04572	-11.6702
GmaxZH037019	--	3.259	0.022	0.0493	0	-7.21078	-6.04572	-11.6702
GmaxZH037131	BZIP34	7.1913	0.756	0.6793	0.3523	-3.2498	-3.40407	-4.35125
GmaxZH037283	--	20.0127	9.9443	5.214	4.7253	-1.00897	-1.94045	-2.08243
GmaxZH037457	FLA11	8.2577	3.11	3.0657	2.0673	-1.40882	-1.42953	-1.99796
GmaxZH037499	KCS12	0.772	0.057	0	0.0147	-3.75957	-9.59246	-5.71799
GmaxZH037736	TIP2-1	9.956	0.4237	0.402	0.676	-4.55456	-4.6303	-3.88047
GmaxZH037805	--	36.731	0.8303	1.5437	2.358	-5.46716	-4.57257	-3.96136
GmaxZH037824	At3g15720	5.127	0.0473	0.2073	0.1163	-6.75911	-4.62809	-5.46178
GmaxZH038022	RGI3	1.9707	0.361	0.36	0.3207	-2.44861	-2.45261	-2.61954
GmaxZH038046	--	0.944	0.032	0.045	0.1113	-4.88264	-4.39079	-3.0839
GmaxZH038434	AVT6C	9.6863	2.0253	3.2113	3.2583	-2.25779	-1.59278	-1.57182
GmaxZH038591	BGAL5	32.237	8.9173	7.693	11.7087	-1.85403	-2.0671	-1.46114
GmaxZH039399	At3g26430	32.449	7.77	9.6787	9.245	-2.06219	-1.74529	-1.81143
GmaxZH039792	ARP1	11.343	0.607	0.9407	0.709	-4.22396	-3.59197	-3.99987
GmaxZH039801	UGT85A24	1.298	5.7613	6.4263	6.148	2.15011234686944	2.30770543187543	2.24382678169163
GmaxZH039955	DIVARICATA	21.7017	7.8983	8.027	8.602	-1.45819	-1.43487	-1.33506
GmaxZH040375	--	14.4943	0.4207	0.849	0.379	-5.10667	-4.09358	-5.25715
GmaxZH040551	PER26	7.4027	0.858	0.6017	1.158	-3.109	-3.62101	-2.67641
GmaxZH040775	Xyl1	15.551	5.5843	4.1533	5.864	-1.47755	-1.90467	-1.40705
GmaxZH040780	ST2	27.6683	7.1883	7.5737	4.2627	-1.94451	-1.86917	-2.69841
GmaxZH040953	AS1	10.139	4.6973	56.355	105.153	-1.11	2.47462824899315	3.37450273771901
GmaxZH041227	At5g18840	19.1737	3.6963	5.5503	3.9733	-2.37496	-1.78848	-2.2707
GmaxZH041232	RBK2	6.2347	0.316	0.564	0.777	-4.30232	-3.46655	-3.00433
GmaxZH041246	At3g07870	4.337	10.9267	11.033	9.333	1.33308400540257	1.34705578138638	1.10564345239243
GmaxZH041325	APA1	7.6467	1.5473	2.5073	3.6167	-2.30505	-1.60868	-1.08017
GmaxZH041369	--	785.942	65.6483	72.5717	95.098	-3.58159	-3.43695	-3.04694
GmaxZH041405	At4g12490	161.339	4.5533	7.3297	4.279	-5.14703	-4.46021	-5.23668
GmaxZH041505	PER22	186.32	524.331	551.871	584.089	1.4926953001136	1.56654765998543	1.64840649379434
GmaxZH041655	BXL1	16.267	1.878	2.8627	2.222	-3.11468	-2.50652	-2.87202
GmaxZH041773	AAH1	6.8267	20.2923	17.8037	21.1743	1.5716815496835	1.38292118034196	1.63306333289421
GmaxZH041987	GRF1	3.2453	0.5307	0.303	0.1783	-2.61249	-3.42098	-4.18572
GmaxZH042977	XI-F	19.0043	2.5507	3.6247	5.5727	-2.89738	-2.39041	-1.76989
GmaxZH043233	ARP1	18.9207	2.4283	2.3257	2.1377	-2.96192	-3.02425	-3.14585
GmaxZH043559	SDR2a	7.8197	1.087	1.527	2.145	-2.84676	-2.35641	-1.86613
GmaxZH043575	--	3.5673	0.583	0.618	0.4447	-2.61328	-2.52917	-3.00405
GmaxZH043694	MIK2	8.3107	0.5863	0.5603	0.645	-3.82517	-3.89061	-3.68759
GmaxZH043760	--	80.2507	20.7893	25.7537	18.7627	-1.94867	-1.63974	-2.09665
GmaxZH044087	BGLU11	0.8587	4.703	4.0433	9.4733	2.45341123946452	2.23537505189325	3.46370205601552
GmaxZH044361	AHK1	13.013	4.891	5.4603	4.7077	-1.41175	-1.25289	-1.46687
GmaxZH044409	KIN7G	2.7797	1.0257	0.569	0.8137	-1.43835	-2.28841	-1.7724
GmaxZH044636	PIP2-2	52.2427	9.3567	11.173	20.229	-2.48116	-2.22521	-1.3688
GmaxZH044727	CESA2	46.768	13.4787	13.8303	15.687	-1.79484	-1.75769	-1.57595
GmaxZH044745	GT-2	3.153	1.2157	1.527	0.7643	-1.37498	-1.04603	-2.04445
GmaxZH044774	--	33.6133	106.027	162.771	771.172	1.65732617433244	2.27573816299289	4.51994777161638
GmaxZH045069	PER47	3.8187	0.5547	0.4053	0.419	-2.78338	-3.23589	-3.18805
GmaxZH045363	GIP2	12.2493	0.4783	0.8503	1.3713	-4.67854	-3.84853	-3.15905
GmaxZH046267	VAMP711	1.4133	0.0997	0.0383	0.237	-3.82585	-5.20436	-2.57614
GmaxZH046618	EXLB1	0.2337	4.4317	2.2813	9.5143	4.24532552273441	3.28735341047879	5.34757872217674
GmaxZH046982	Bp10	26.6863	0.3933	1.2803	1.039	-6.0842	-4.38151	-4.68283
GmaxZH047227	PER45	7.5293	0.8093	0.7603	0.68	-3.21772	-3.30782	-3.46892
GmaxZH047773	BGAL5	20.663	3.0023	2.444	3.7753	-2.78289	-3.07973	-2.45237
GmaxZH047805	--	10.843	3.9567	3.934	2.5613	-1.45441	-1.4627	-2.0818
GmaxZH047833	EXPA11	8.7177	0.1417	0.3287	0.2277	-5.94337	-4.72924	-5.25895
GmaxZH047972	At1g67750	4.0053	0.2027	0.318	0.5017	-4.30474	-3.65482	-2.99712
GmaxZH048101	--	2.9513	0.0847	0.1967	0.0787	-5.12343	-3.90754	-5.22947
GmaxZH048709	At4g26880	9.7193	0.0303	0.1617	0.083	-8.32381	-5.90976	-6.8716
GmaxZH048866	--	1.5093	0.0383	0.0913	0	-5.29917	-4.04663	-10.5597
GmaxZH049052	DNAJB1	40.977	7.696	6.702	5.7407	-2.41263	-2.61215	-2.83552
GmaxZH049651	At3g07010	9.3913	0.9687	1.2377	1.1223	-3.27726	-2.92371	-3.06483
GmaxZH050064	DIR25	11.8717	1.6077	1.6797	1.258	-2.88448	-2.82128	-3.23832
GmaxZH050221	TI572	48.7993	212.583	122.431	163.867	2.12309514928906	1.32703948430805	1.74758907117189
GmaxZH050489	--	92.0287	29.1163	30.1013	23.998	-1.66025	-1.61226	-1.93917
GmaxZH050581	LNG1	1.0147	0.0403	0.0653	0.0343	-4.65289	-3.95704	-4.88525
GmaxZH050589	FER	6.7573	2.4713	2.844	2.161	-1.45116	-1.24853	-1.64475
GmaxZH051009	At3g28050	1.8307	0.5913	0.4583	0.599	-1.63033	-1.9979	-1.61174
GmaxZH051100	ABCB19	9.3237	2.4833	2.2823	3.5917	-1.90862	-2.03039	-1.37624
GmaxZH051172	--	1.7813	0.0217	0.0223	0.0653	-6.36134	-6.31762	-4.76899
GmaxZH051297	TBL19	14.5437	4.0533	3.6687	3.3547	-1.84321	-1.98706	-2.11615
GmaxZH051303	TBL19	2.1113	0.0607	0	0.0437	-5.12111	-11.0439	-5.59548
GmaxZH051356	RBCS-1	22.674	4.5483	9.4443	2.786	-2.31763	-1.26352	-3.02477
GmaxZH051358	RBCS-1	19.7743	3.4187	3.7417	0.8177	-2.53212	-2.40188	-4.59597
GmaxZH051857	MTR_2g086740	16.546	1.605	1.3163	1.3107	-3.36584	-3.65189	-3.65811
GmaxZH052020	--	2.4313	0.3173	0.3383	0.2173	-2.93768	-2.84523	-3.48377
GmaxZH052561	CYCP3-1	34.958	15.3363	13.203	16.2697	-1.18867	-1.40476	-1.10344
GmaxZH052608	AUX28	12.7037	1.4633	1.0357	1.1027	-3.11791	-3.61661	-3.52618
GmaxZH052803	--	10.6427	3.6743	4.255	4.932	-1.53431	-1.32263	-1.10961
GmaxZH052911	SBEI	7.4093	19.253	20.7253	15.5683	1.37766761920061	1.48397966063485	1.07119886040267
GmaxZH052987	NHL1	118.728	21.6387	23.5093	23.524	-2.45597	-2.33635	-2.33545
GmaxZH053285	--	12.017	0.0223	0.0893	0.115	-9.07166	-7.07166	-6.7073
GmaxZH053555	--	14.8807	4.1623	5.316	6.1793	-1.83797	-1.48503	-1.26792
GmaxZH053573	APRR5	0.951	3.2103	3.3807	3.3223	1.75520585594036	1.82979052748492	1.80467958153337
GmaxZH053939	PHO1;H3	3.6757	8.9237	15.0257	26.326	1.27963068477018	2.03135115789503	2.84041048872811
GmaxZH053964	CES101	2.67	0.245	0.4157	0.453	-3.44599	-2.68334	-2.55926
GmaxZH054373	OPT7	14.431	3.4127	4.2403	1.765	-2.0802	-1.76692	-3.03143
GmaxZH054515	DIR16	16.721	1.724	1.8723	1.4223	-3.27783	-3.15875	-3.55533
GmaxZH054630	PAE10	2.0693	0.271	0.2407	0.1477	-2.9328	-3.10406	-3.80875
GmaxZH054834	At3g53190	29.32	9.3033	9.407	9.1987	-1.65607	-1.64008	-1.67239
GmaxZH055070	XTH10	2.1213	0.405	0.8163	0.7933	-2.38898	-1.37774	-1.41897
GmaxZH055113	CRK25	7.476	3.4583	3.2323	3.6853	-1.11219	-1.20969	-1.02047
GmaxZH055143	--	4.1193	0.2287	0.255	0.316	-4.17109	-4.01384	-3.70441
GmaxZH055364	GT-2	10.8597	5.192	4.983	4.829	-1.06462	-1.12389	-1.16918
GmaxZH055365	GT-2	16.8563	6.0553	7.0637	6.5793	-1.47701	-1.2548	-1.35728
GmaxZH055690	ufaA1	1.2487	0.0813	0.0557	0.0697	-3.9404	-4.48743	-4.16378
GmaxZH055781	IAA14	44.387	9.882	9.8677	6.599	-2.16726	-2.16936	-2.74982
GmaxZH055788	KCS11	5.144	11.8297	12.936	16.732	1.20144687457865	1.33042903614571	1.70164735531609
GmaxZH055884	At3g05950	1.1183	4.9033	4.151	7.4217	2.13241257505465	1.89210866623722	2.73039294024273
GmaxZH055885	At3g05950	23.6277	111.573	103.35	155.006	2.23944318683509	2.12898931962212	2.7137780939836
GmaxZH055917	At5g28300	1.9083	0.367	0.5077	0.6123	-2.37846	-1.91036	-1.63992
GmaxZH055919	--	0.6603	2.648	24.1697	52.939	2.00363674263889	5.19385929184982	6.32499265844513
GmaxZH055947	PXL1	2.3513	0.6573	0.7437	0.4207	-1.83878	-1.66075	-2.48273
MSTRG.16122	--	1.1443	7.1177	8.6857	4.0923	2.63689701381128	2.92412923039064	1.83841630531302
MSTRG.16133	--	3.1343	1.3443	1.2683	0.4947	-1.22127	-1.30522	-2.66363
MSTRG.8967	--	1.8527	0.4373	0.2267	0.6087	-2.0828	-3.03096	-1.60588

## Sheet: Table S6
Table S6. p-values of significantly enriched GO terms among DEGs under different Sb treatments.
ID	Descrption	Sb0_vs_Sb1	Sb0_vs_Sb10	Sb0_vs_Sb50	Sb1_vs_Sb10	Sb10_vs_Sb50	Sb1_vs_Sb50
GO:0016209	antioxidant activity	1.22212914986506e-10	3.01994076082017e-11	6.18979640160023e-11	9.65533382308516e-08	1.05660535139026e-08	3.44241511415008e-11
GO:0048046	apoplast	1.23657522698857e-08	2.39349920899168e-07	0.000555537530684338	0.296943765883764	0.000988406363657594	0.0346211222431237
GO:0005975	carbohydrate metabolic process	1.97429174250968e-11	3.66649725630091e-13	3.51786136542007e-08	0.000106885548166862	3.32078822586202e-08	2.99593008329616e-10
GO:0003824	catalytic activity	7.43671560605071e-08	6.46545266654015e-11	7.42371338190839e-12	1.46649220838932e-05	9.73079114564495e-08	3.96427424758764e-10
GO:0008037	cell recognition	0.358578691714288	0.0752752252066042	1.70779240332180e-12	0.00976627608837193	0.00318778884227157	2.53530147206356e-08
GO:0071555	cell wall organization	2.50327516157643e-09	7.50092077917875e-05	0.000131031943273528	0.425355979849734	1.65081986651009e-05	2.44481709275849e-05
GO:0071554	cell wall organization or biogenesis	4.99201451032393e-08	0.00174060901740182	7.12531871377959e-06	0.704686152490696	3.81883991006129e-05	1.52079681169428e-06
GO:0006073	cellular glucan metabolic process	1.45951166961775e-10	2.61399469097258e-07	0.00328225821566204	0.0501629090445661	0.0625691241791125	0.164300566379928
GO:0015267	channel activity	4.08672772427881e-07	2.27512373960406e-11	1.52706096580435e-09	1.46330633835733e-05	0.00134412439146984	9.52640891702757e-07
GO:0005507	copper ion binding	1.49713632000981e-06	2.84710030702224e-08	7.8669865763438e-05	0.0578261038551057	0.00132537030257469	9.02751682639003e-06
GO:0044042	glucan metabolic process	1.66239882742266e-10	9.40899447473645e-08	0.00205145199736304	0.0224966066693253	0.0443161172403244	0.132804644958779
GO:0046527	glucosyltransferase activity	2.07758077132843e-11	3.10428846764413e-08	0.00303682811083262	0.00597536314822228	0.0587307294879243	0.0366578151345952
GO:0020037	heme binding	3.86904196769053e-12	3.22870535905109e-18	6.61170332318667e-42	1.06191593641745e-17	8.53155420128063e-33	9.38574702355768e-41
GO:0016758	hexosyltransferase activity	3.50017354454406e-08	8.77045288796724e-06	0.00529395096836075	0.110984725702556	0.0215978546553785	0.00085997601305598
GO:0016798	hydrolase activity, acting on glycosyl bonds	3.49338047671337e-13	1.52212436601942e-13	1.29147619891613e-07	0.0286582745085802	8.72477793885061e-06	1.59111368947734e-06
GO:0005887	integral component of plasma membrane	0.258184567228266	2.48286017376095e-06	1.7573299277341e-11	4.66579531997421e-06	1.44096116438863e-05	5.19016418901215e-09
GO:0005506	iron ion binding	0.00822351373934086	9.86837516359187e-06	1.45212539094737e-24	2.11321423300423e-07	7.79173571960444e-20	1.73799978540966e-19
GO:0016491	oxidoreductase activity	5.15395111228245e-10	4.14753730580547e-16	2.85512265873838e-33	1.73944072244029e-13	8.87542838553945e-21	2.10351820500768e-31
GO:0016684	oxidoreductase activity, acting on peroxide as acceptor	2.03704445044044e-15	1.05089242827388e-16	2.02674605010433e-14	2.29550695161743e-10	6.39821626271238e-10	2.41148047832558e-13
GO:0022803	passive transmembrane transporter activity	4.08672772427881e-07	2.27512373960406e-11	1.52706096580435e-09	1.46330633835733e-05	0.00134412439146984	9.52640891702757e-07
GO:1904680	peptide transmembrane transporter activity	0.355566683070787	0.000187058772064205	2.30868159671718e-11	0.00225842352612728	1.85753231246962e-06	2.26891599143307e-10
GO:0004601	peroxidase activity	4.5457282237782e-16	1.65469170937406e-17	1.86447567626353e-15	9.13322767678354e-11	1.09316650449938e-10	1.88490599697272e-13
GO:0006979	response to oxidative stress	1.10652712646808e-14	1.02521059222114e-14	1.2652644861407e-11	2.13934947140637e-11	4.60898512973116e-07	1.61281548414357e-10
GO:0009011	starch synthase activity	6.60807903768291e-08	0.000115422963053821	0.141749921554815	0.545988669531806	0.567522896671082	0.736683317643345
GO:0055085	transmembrane transport	0.00052425851918587	5.93020722039157e-05	5.92500674395291e-10	0.00944816467882324	6.79541498497474e-09	2.78500633968321e-09
GO:0022857	transmembrane transporter activity	1.75827528202305e-05	2.73091754537117e-08	1.65846625672517e-09	2.45422502613869e-05	2.08601014774676e-09	4.61858077492553e-14
GO:0042910	xenobiotic transmembrane transporter activity	0.264555317359715	0.00046490797557222	9.67963804401617e-12	0.000681949318394963	2.98211855675852e-07	2.64706700936344e-12

## Sheet: Table S7
Table S7. p-values of significantly enriched KEGG pathways among DEGs under different Sb treatments.
ID	Pathway	Sb0_vs_Sb1	Sb0_vs_Sb10	Sb0_vs_Sb50	Sb1_vs_Sb10	Sb10_vs_Sb50	Sb1_vs_Sb50
ko02010	ABC transporters	0.420148	0.0239603	0.00200905	0.000988463	0.0267972	8.982456e-05
ko00250	Alanine, aspartate and glutamate metabolism	0.0493539	0.756729	0.000387959	0.832061	0.00219325	0.00290585
ko00410	beta-Alanine metabolism	0.0824293	0.672979	0.000204257	1	0.445531	0.0565845
ko01110	Biosynthesis of secondary metabolites	5.245701e-16	9.254967e-14	1.203923e-32	3.454588e-10	5.983438e-24	2.503297e-40
ko00999	Biosynthesis of various plant secondary metabolites	0.00500999	0.0168829	0.0299392	0.100184	0.00549486	2.778265e-05
ko00905	Brassinosteroid biosynthesis	0.0985413	0.552495	0.000821864	0.300883	0.00261435	0.00105725
ko00904	Diterpenoid biosynthesis	0.625662	0.892609	2.792199e-07	1	1.849975e-10	4.293137e-10
ko00944	Flavone and flavonol biosynthesis	0.849664	0.0391194	0.00366181	0.045285	0.0479608	0.0566748
ko00941	Flavonoid biosynthesis	0.520291	0.00773469	0.00397683	0.111105	0.12909	0.000373732
ko00052	Galactose metabolism	0.0493539	0.355948	0.00637213	0.258336	0.0567394	0.209642
ko00966	Glucosinolate biosynthesis	0.267049	0.371019	0.00164913	0.186493	0.203064	0.00650238
ko00480	Glutathione metabolism	0.660477	0.00709724	5.421586e-06	0.0305856	0.106081	0.00346321
ko00630	Glyoxylate and dicarboxylate metabolism	0.021605	0.0688784	0.470273	0.901104	0.457545	0.179923
ko00943	Isoflavonoid biosynthesis	0.143311	2.089383e-05	1.726133e-12	1.355729e-08	1.258412e-10	1.308537e-23
ko00950	Isoquinoline alkaloid biosynthesis	0.034277	7.547327e-05	0.000275021	0.0485877	0.433557	0.0666494
ko00591	Linoleic acid metabolism	0.4429	0.0710704	0.00171962	0.0175842	0.588333	0.431891
ko01100	Metabolic pathways	6.052725e-15	6.48788e-13	9.145314e-26	3.167599e-06	3.830883e-21	2.723761e-25
ko00902	Monoterpenoid biosynthesis	0.311239	0.0162165	0.310458	1	0.015769	0.194448
ko00910	Nitrogen metabolism	0.528954	0.741619	2.213606e-07	0.113133	7.342527e-05	0.000282863
ko00040	Pentose and glucuronate interconversions	3.540366e-06	0.0410297	0.00174075	0.665251	0.00640739	0.0208878
ko00940	Phenylpropanoid biosynthesis	2.82693e-15	1.210078e-17	1.542749e-18	4.227219e-11	3.631232e-09	4.3054e-16
ko00500	Starch and sucrose metabolism	1.51743e-05	0.00769613	0.00369752	0.161521	0.0982766	0.0136609
ko00960	Tropane, piperidine and pyridine alkaloid biosynthesis	0.47032	0.0295128	0.000252127	0.283393	0.0272283	0.000659027
ko00350	Tyrosine metabolism	0.0800456	0.00215394	0.00966798	0.0671557	0.288453	0.358553
ko00750	Vitamin B6 metabolism	0.000231037	0.00967146	0.835472	1	0.0180626	0.0851167
ko00908	Zeatin biosynthesis	0.152972	0.325379	4.39456e-05	0.227646	0.00341528	6.50049e-06

## Sheet: Table S8
Table S8. GO enrichment analysis of DEGs across distinct expression modules under Sb stress.
GO ID	Description	Gene counts	All (28610)	Genes	pvalue	p.adjust
Top 20 enriched GO terms in the bright green module (Profile 12 and 19)
GO:0004601	peroxidase activity	26	263	GmaxZH001422(PER52);GmaxZH001424(PNC1);GmaxZH001973(PER10);GmaxZH004913(PNC1);GmaxZH006029(PNC1);GmaxZH006030(PNC1);GmaxZH006031(PNC1);GmaxZH006032(PNC1);GmaxZH006033(PNC1);GmaxZH006034(PNC1);GmaxZH006036(GSVIVT00023967001);GmaxZH010549(PER52);GmaxZH014473(APXT);GmaxZH014928(RBOHC);GmaxZH016173(PER52);GmaxZH018892(PER10);GmaxZH025893(PNC1);GmaxZH030970(PNC1);GmaxZH038428(GSVIVT00023967001);GmaxZH…	1.14215973728161e-10	2.18438049755108e-08
GO:0006559	L-phenylalanine catabolic process	19	188	GmaxZH002807(GSTU18);GmaxZH002808(GSTU17);GmaxZH004454(HSP26-A);GmaxZH012577(HSP26-A);GmaxZH012578(HSP26-A);GmaxZH015229(GSTU9);GmaxZH015721(At5g53970);GmaxZH018095(HSP26-A);GmaxZH018097(HSP26-A);GmaxZH018098(HSP26-A);GmaxZH020638(HSP26-A);GmaxZH021188(GST3);GmaxZH021242(ALD1);GmaxZH025678(ACS1);GmaxZH028094(HSP26-A);GmaxZH031268(PARA);GmaxZH043400(ACS1);GmaxZH049815(HSP26-A);GmaxZH052760(GSTL1)	1.33115135725806e-08	2.01299666358691e-06
GO:1902222	erythrose 4-phosphate/phosphoenolpyruvate family amino acid catabolic process	19	188	GmaxZH002807(GSTU18);GmaxZH002808(GSTU17);GmaxZH004454(HSP26-A);GmaxZH012577(HSP26-A);GmaxZH012578(HSP26-A);GmaxZH015229(GSTU9);GmaxZH015721(At5g53970);GmaxZH018095(HSP26-A);GmaxZH018097(HSP26-A);GmaxZH018098(HSP26-A);GmaxZH020638(HSP26-A);GmaxZH021188(GST3);GmaxZH021242(ALD1);GmaxZH025678(ACS1);GmaxZH028094(HSP26-A);GmaxZH031268(PARA);GmaxZH043400(ACS1);GmaxZH049815(HSP26-A);GmaxZH052760(GSTL1)	1.33115135725806e-08	2.01299666358691e-06
GO:0016491	oxidoreductase activity	173	4568	GmaxZH000058(MIOX2);GmaxZH001177(LAC7);GmaxZH001422(PER52);GmaxZH001424(PNC1);GmaxZH001820(CYP84A1);GmaxZH001926(CYP71D8);GmaxZH001973(PER10);GmaxZH002129(CYP88D6);GmaxZH002230(LDHA);GmaxZH002891(ALDH2B7);GmaxZH003748(SRG1);GmaxZH003848(--);GmaxZH004046(CYP71D8);GmaxZH004047(CYP71D8);GmaxZH004454(HSP26-A);GmaxZH004913(PNC1);GmaxZH005735(CYP86A4);GmaxZH006029(PNC1);GmaxZH006030(PNC1);GmaxZH006031(…	1.43848858694202e-14	3.66814589670216e-12
GO:0005887	integral component of plasma membrane	44	854	GmaxZH000088(ABCB8);GmaxZH000976(ABCG21);GmaxZH002648(ABCB11);GmaxZH004966(NHL6);GmaxZH005523(ABCC3);GmaxZH005525(ABCC3);GmaxZH005573(AAP7);GmaxZH006538(RBL1);GmaxZH006746(ABCC9);GmaxZH007204(At2g48020);GmaxZH007447(ABCG20);GmaxZH009487(DUR3);GmaxZH011016(ABCG32);GmaxZH015205(ABCA2);GmaxZH015206(ABCA7);GmaxZH015699(GLR2.8);GmaxZH017912(ABCC9);GmaxZH019320(DMP2);GmaxZH020585(At3g13620);GmaxZH02074…	1.51852135456379e-09	3.85704424059203e-07
GO:0006979	response to oxidative stress	25	322	GmaxZH001422(PER52);GmaxZH001424(PNC1);GmaxZH001973(PER10);GmaxZH004913(PNC1);GmaxZH006029(PNC1);GmaxZH006030(PNC1);GmaxZH006031(PNC1);GmaxZH006032(PNC1);GmaxZH006033(PNC1);GmaxZH006034(PNC1);GmaxZH006036(GSVIVT00023967001);GmaxZH010549(PER52);GmaxZH014473(APXT);GmaxZH016173(PER52);GmaxZH018892(PER10);GmaxZH025893(PNC1);GmaxZH030970(PNC1);GmaxZH038428(GSVIVT00023967001);GmaxZH040051(PNC1);GmaxZH0…	1.62563881613925e-08	2.21249442876552e-06
GO:0009875	pollen-pistil interaction	23	142	GmaxZH001294(At4g27290);GmaxZH006660(LECRK3);GmaxZH015985(SD11);GmaxZH016002(At4g27290);GmaxZH016037(At4g27290);GmaxZH017774(PK1);GmaxZH017776(PK1);GmaxZH020090(RKS1);GmaxZH022985(At1g11330);GmaxZH022986(SD113);GmaxZH024107(At4g27290);GmaxZH030874(At4g27290);GmaxZH032797(At4g03230);GmaxZH033190(SD18);GmaxZH033192(At4g27290);GmaxZH033214(At4g27290);GmaxZH033231(At4g27290);GmaxZH033888(At2g19130);G…	1.8989822756072e-14	1.2922574385507e-11
GO:0048544	recognition of pollen	23	142	GmaxZH001294(At4g27290);GmaxZH006660(LECRK3);GmaxZH015985(SD11);GmaxZH016002(At4g27290);GmaxZH016037(At4g27290);GmaxZH017774(PK1);GmaxZH017776(PK1);GmaxZH020090(RKS1);GmaxZH022985(At1g11330);GmaxZH022986(SD113);GmaxZH024107(At4g27290);GmaxZH030874(At4g27290);GmaxZH032797(At4g03230);GmaxZH033190(SD18);GmaxZH033192(At4g27290);GmaxZH033214(At4g27290);GmaxZH033231(At4g27290);GmaxZH033888(At2g19130);G…	1.8989822756072e-14	1.2922574385507e-11
GO:0006468	protein phosphorylation	95	2596	GmaxZH000054(At4g29180);GmaxZH000082(HSL2);GmaxZH001294(At4g27290);GmaxZH006660(LECRK3);GmaxZH008481(PIX13);GmaxZH009523(CRK25);GmaxZH010356(At1g54610);GmaxZH010643(At3g47110);GmaxZH011813(At5g66900);GmaxZH012172(BAK1);GmaxZH012174(BAK1);GmaxZH014971(At1g54610);GmaxZH015985(SD11);GmaxZH016001(At4g27290);GmaxZH016002(At4g27290);GmaxZH016037(At4g27290);GmaxZH017098(RIPK);GmaxZH017774(PK1);GmaxZH017…	2.06953199091772e-08	2.32807694416574e-06
GO:0020037	heme binding	62	760	GmaxZH001422(PER52);GmaxZH001424(PNC1);GmaxZH001820(CYP84A1);GmaxZH001926(CYP71D8);GmaxZH001973(PER10);GmaxZH002129(CYP88D6);GmaxZH004046(CYP71D8);GmaxZH004047(CYP71D8);GmaxZH004913(PNC1);GmaxZH005735(CYP86A4);GmaxZH006029(PNC1);GmaxZH006030(PNC1);GmaxZH006031(PNC1);GmaxZH006032(PNC1);GmaxZH006033(PNC1);GmaxZH006034(PNC1);GmaxZH006036(GSVIVT00023967001);GmaxZH007152(CYP93A1);GmaxZH007937(CYP72A68…	2.109881332272e-19	1.61405921918808e-16
GO:0009856	pollination	23	160	GmaxZH001294(At4g27290);GmaxZH006660(LECRK3);GmaxZH015985(SD11);GmaxZH016002(At4g27290);GmaxZH016037(At4g27290);GmaxZH017774(PK1);GmaxZH017776(PK1);GmaxZH020090(RKS1);GmaxZH022985(At1g11330);GmaxZH022986(SD113);GmaxZH024107(At4g27290);GmaxZH030874(At4g27290);GmaxZH032797(At4g03230);GmaxZH033190(SD18);GmaxZH033192(At4g27290);GmaxZH033214(At4g27290);GmaxZH033231(At4g27290);GmaxZH033888(At2g19130);G…	2.62019926073622e-13	7.13218238772398e-11
GO:0044706	multi-multicellular organism process	23	160	GmaxZH001294(At4g27290);GmaxZH006660(LECRK3);GmaxZH015985(SD11);GmaxZH016002(At4g27290);GmaxZH016037(At4g27290);GmaxZH017774(PK1);GmaxZH017776(PK1);GmaxZH020090(RKS1);GmaxZH022985(At1g11330);GmaxZH022986(SD113);GmaxZH024107(At4g27290);GmaxZH030874(At4g27290);GmaxZH032797(At4g03230);GmaxZH033190(SD18);GmaxZH033192(At4g27290);GmaxZH033214(At4g27290);GmaxZH033231(At4g27290);GmaxZH033888(At2g19130);G…	2.62019926073622e-13	7.13218238772398e-11
GO:0005506	iron ion binding	39	623	GmaxZH000058(MIOX2);GmaxZH001820(CYP84A1);GmaxZH001926(CYP71D8);GmaxZH002129(CYP88D6);GmaxZH004046(CYP71D8);GmaxZH004047(CYP71D8);GmaxZH005735(CYP86A4);GmaxZH007152(CYP93A1);GmaxZH007937(CYP72A68);GmaxZH008646(AOS1);GmaxZH011107(CYP75B2);GmaxZH011108(CYP75B2);GmaxZH014763(AZG1);GmaxZH015308(CYP75B2);GmaxZH020703(CYP716A17);GmaxZH020853(CYP71AU50);GmaxZH023597(CYP81E1);GmaxZH027257(CYP71D8);GmaxZH…	2.94114690251454e-09	3.74996230070604e-07
GO:0008037	cell recognition	23	145	GmaxZH001294(At4g27290);GmaxZH006660(LECRK3);GmaxZH015985(SD11);GmaxZH016002(At4g27290);GmaxZH016037(At4g27290);GmaxZH017774(PK1);GmaxZH017776(PK1);GmaxZH020090(RKS1);GmaxZH022985(At1g11330);GmaxZH022986(SD113);GmaxZH024107(At4g27290);GmaxZH030874(At4g27290);GmaxZH032797(At4g03230);GmaxZH033190(SD18);GmaxZH033192(At4g27290);GmaxZH033214(At4g27290);GmaxZH033231(At4g27290);GmaxZH033888(At2g19130);G…	3.02274341020253e-14	1.37131792709521e-11
GO:0016684	oxidoreductase activity, acting on peroxide as acceptor	26	277	GmaxZH001422(PER52);GmaxZH001424(PNC1);GmaxZH001973(PER10);GmaxZH004913(PNC1);GmaxZH006029(PNC1);GmaxZH006030(PNC1);GmaxZH006031(PNC1);GmaxZH006032(PNC1);GmaxZH006033(PNC1);GmaxZH006034(PNC1);GmaxZH006036(GSVIVT00023967001);GmaxZH010549(PER52);GmaxZH014473(APXT);GmaxZH014928(RBOHC);GmaxZH016173(PER52);GmaxZH018892(PER10);GmaxZH025893(PNC1);GmaxZH030970(PNC1);GmaxZH038428(GSVIVT00023967001);GmaxZH…	3.55431829744579e-10	5.43810699509207e-08
GO:0006570	tyrosine metabolic process	20	195	GmaxZH002807(GSTU18);GmaxZH002808(GSTU17);GmaxZH004454(HSP26-A);GmaxZH012577(HSP26-A);GmaxZH012578(HSP26-A);GmaxZH015229(GSTU9);GmaxZH015721(At5g53970);GmaxZH018095(HSP26-A);GmaxZH018097(HSP26-A);GmaxZH018098(HSP26-A);GmaxZH020638(HSP26-A);GmaxZH021188(GST3);GmaxZH021242(ALD1);GmaxZH025678(ACS1);GmaxZH028094(HSP26-A);GmaxZH031268(PARA);GmaxZH043400(ACS1);GmaxZH049815(HSP26-A);GmaxZH052760(GSTL1);…	4.28946458214194e-09	9.7299354938253e-07
GO:0046906	tetrapyrrole binding	63	795	GmaxZH001422(PER52);GmaxZH001424(PNC1);GmaxZH001820(CYP84A1);GmaxZH001926(CYP71D8);GmaxZH001973(PER10);GmaxZH002129(CYP88D6);GmaxZH004046(CYP71D8);GmaxZH004047(CYP71D8);GmaxZH004913(PNC1);GmaxZH005735(CYP86A4);GmaxZH006029(PNC1);GmaxZH006030(PNC1);GmaxZH006031(PNC1);GmaxZH006032(PNC1);GmaxZH006033(PNC1);GmaxZH006034(PNC1);GmaxZH006036(GSVIVT00023967001);GmaxZH007152(CYP93A1);GmaxZH007937(CYP72A68…	4.56427977943958e-19	1.74583701563564e-16
GO:0016034	maleylacetoacetate isomerase activity	15	103	GmaxZH002807(GSTU18);GmaxZH002808(GSTU17);GmaxZH004454(HSP26-A);GmaxZH012577(HSP26-A);GmaxZH012578(HSP26-A);GmaxZH015229(GSTU9);GmaxZH018095(HSP26-A);GmaxZH018097(HSP26-A);GmaxZH018098(HSP26-A);GmaxZH020638(HSP26-A);GmaxZH021188(GST3);GmaxZH028094(HSP26-A);GmaxZH031268(PARA);GmaxZH049815(HSP26-A);GmaxZH052760(GSTL1)	5.34362056333174e-09	5.8398139013554e-07
GO:0006572	tyrosine catabolic process	19	180	GmaxZH002807(GSTU18);GmaxZH002808(GSTU17);GmaxZH004454(HSP26-A);GmaxZH012577(HSP26-A);GmaxZH012578(HSP26-A);GmaxZH015229(GSTU9);GmaxZH015721(At5g53970);GmaxZH018095(HSP26-A);GmaxZH018097(HSP26-A);GmaxZH018098(HSP26-A);GmaxZH020638(HSP26-A);GmaxZH021188(GST3);GmaxZH021242(ALD1);GmaxZH025678(ACS1);GmaxZH028094(HSP26-A);GmaxZH031268(PARA);GmaxZH043400(ACS1);GmaxZH049815(HSP26-A);GmaxZH052760(GSTL1)	6.4941177901594e-09	1.26264204462956e-06
GO:0031226	intrinsic component of plasma membrane	45	935	GmaxZH000088(ABCB8);GmaxZH000976(ABCG21);GmaxZH002648(ABCB11);GmaxZH004966(NHL6);GmaxZH005523(ABCC3);GmaxZH005525(ABCC3);GmaxZH005573(AAP7);GmaxZH006538(RBL1);GmaxZH006746(ABCC9);GmaxZH007204(At2g48020);GmaxZH007447(ABCG20);GmaxZH009487(DUR3);GmaxZH011016(ABCG32);GmaxZH012306(LYM2);GmaxZH015205(ABCA2);GmaxZH015206(ABCA7);GmaxZH015699(GLR2.8);GmaxZH017912(ABCC9);GmaxZH019320(DMP2);GmaxZH020585(At3…	7.97938948855058e-09	1.01338246504592e-06
Top 20 enriched GO terms in the bright purple module (Profile 2)
GO:0006979	response to oxidative stress	22	322	GmaxZH004270(PER53);GmaxZH006044(PNC1);GmaxZH007752(PER3);GmaxZH012018(PER50);GmaxZH016499(PER3);GmaxZH021067(PER7);GmaxZH023357(PER54);GmaxZH026198(PER3);GmaxZH033855(PER3);GmaxZH033856(PER39);GmaxZH034139(GRI);GmaxZH035221(PER16);GmaxZH037262(PER39);GmaxZH037639(PER61);GmaxZH040053(GSVIVT00023967001);GmaxZH040234(PER64);GmaxZH040551(PER26);GmaxZH044713(PER12);GmaxZH045069(PER47);GmaxZH046777(PE…	3.03068777046029e-10	3.68834701665017e-07
GO:0005975	carbohydrate metabolic process	73	2897	GmaxZH000849(At2g43860);GmaxZH002730(At4g02290);GmaxZH003327(CESA2);GmaxZH003831(CML30);GmaxZH004980(SUS6);GmaxZH005788(SDR1);GmaxZH005891(--);GmaxZH005892(--);GmaxZH005893(--);GmaxZH005894(--);GmaxZH005957(--);GmaxZH007058(GNS1);GmaxZH007530(XTH32);GmaxZH007900(SDR3b);GmaxZH010802(BGAL16);GmaxZH011781(--);GmaxZH013102(UGE2);GmaxZH013386(PEAMT);GmaxZH013690(HHT1);GmaxZH013700(CBSX3);GmaxZH017046(…	2.22081193196858e-08	9.26365433672782e-06
GO:0006073	cellular glucan metabolic process	21	381	GmaxZH003327(CESA2);GmaxZH004980(SUS6);GmaxZH007530(XTH32);GmaxZH017046(bshA);GmaxZH017060(--);GmaxZH021499(--);GmaxZH024166(CESA3);GmaxZH024845(SUS6);GmaxZH027948(--);GmaxZH028660(XTH8);GmaxZH030761(XTH31);GmaxZH031402(SUS6);GmaxZH032577(XTH32);GmaxZH033876(XTH9);GmaxZH040126(SUS6);GmaxZH041465(KOR);GmaxZH043062(CESA3);GmaxZH043520(XTHB);GmaxZH044727(CESA2);GmaxZH045156(SUS6);GmaxZH055070(XTH10)	3.39114304543857e-08	9.26365433672782e-06
GO:0044042	glucan metabolic process	21	383	GmaxZH003327(CESA2);GmaxZH004980(SUS6);GmaxZH007530(XTH32);GmaxZH017046(bshA);GmaxZH017060(--);GmaxZH021499(--);GmaxZH024166(CESA3);GmaxZH024845(SUS6);GmaxZH027948(--);GmaxZH028660(XTH8);GmaxZH030761(XTH31);GmaxZH031402(SUS6);GmaxZH032577(XTH32);GmaxZH033876(XTH9);GmaxZH040126(SUS6);GmaxZH041465(KOR);GmaxZH043062(CESA3);GmaxZH043520(XTHB);GmaxZH044727(CESA2);GmaxZH045156(SUS6);GmaxZH055070(XTH10)	3.70825626455331e-08	9.26365433672782e-06
GO:0044264	cellular polysaccharide metabolic process	30	734	GmaxZH003327(CESA2);GmaxZH004980(SUS6);GmaxZH007530(XTH32);GmaxZH013102(UGE2);GmaxZH013690(HHT1);GmaxZH017046(bshA);GmaxZH017060(--);GmaxZH019738(UGE2);GmaxZH020554(GAE6);GmaxZH021499(--);GmaxZH024166(CESA3);GmaxZH024845(SUS6);GmaxZH027948(--);GmaxZH028660(XTH8);GmaxZH030761(XTH31);GmaxZH031402(SUS6);GmaxZH031809(GAE6);GmaxZH032577(XTH32);GmaxZH033876(XTH9);GmaxZH037527(UXS5);GmaxZH040126(SUS6);G…	3.80593851139187e-08	9.26365433672782e-06
GO:0005976	polysaccharide metabolic process	36	1047	GmaxZH003327(CESA2);GmaxZH003831(CML30);GmaxZH004980(SUS6);GmaxZH005788(SDR1);GmaxZH007530(XTH32);GmaxZH007900(SDR3b);GmaxZH011781(--);GmaxZH013102(UGE2);GmaxZH013690(HHT1);GmaxZH017046(bshA);GmaxZH017060(--);GmaxZH019738(UGE2);GmaxZH020554(GAE6);GmaxZH021499(--);GmaxZH024166(CESA3);GmaxZH024845(SUS6);GmaxZH027948(--);GmaxZH028660(XTH8);GmaxZH030761(XTH31);GmaxZH031402(SUS6);GmaxZH031809(GAE6);Gm…	1.24693251948545e-07	2.52919479368966e-05
GO:0004601	peroxidase activity	21	263	GmaxZH004270(PER53);GmaxZH006044(PNC1);GmaxZH007752(PER3);GmaxZH012018(PER50);GmaxZH016499(PER3);GmaxZH021067(PER7);GmaxZH023357(PER54);GmaxZH026198(PER3);GmaxZH033855(PER3);GmaxZH033856(PER39);GmaxZH035221(PER16);GmaxZH037262(PER39);GmaxZH037639(PER61);GmaxZH040053(GSVIVT00023967001);GmaxZH040234(PER64);GmaxZH040551(PER26);GmaxZH044713(PER12);GmaxZH045069(PER47);GmaxZH046777(PER50);GmaxZH047227(…	9.79360885668923e-12	6.28749688599448e-09
GO:0016684	oxidoreductase activity, acting on peroxide as acceptor	21	277	GmaxZH004270(PER53);GmaxZH006044(PNC1);GmaxZH007752(PER3);GmaxZH012018(PER50);GmaxZH016499(PER3);GmaxZH021067(PER7);GmaxZH023357(PER54);GmaxZH026198(PER3);GmaxZH033855(PER3);GmaxZH033856(PER39);GmaxZH035221(PER16);GmaxZH037262(PER39);GmaxZH037639(PER61);GmaxZH040053(GSVIVT00023967001);GmaxZH040234(PER64);GmaxZH040551(PER26);GmaxZH044713(PER12);GmaxZH045069(PER47);GmaxZH046777(PER50);GmaxZH047227(…	2.60816959908162e-11	8.37222441305201e-09
GO:0015267	channel activity	29	644	GmaxZH002212(TIP2-2);GmaxZH003222(SIP1-1);GmaxZH004809(HIPP09);GmaxZH005111(TRG-31);GmaxZH007543(AQP1);GmaxZH007692(NHL1);GmaxZH013026(PIP1-2);GmaxZH014195(TIP4-1);GmaxZH016131(CNGC4);GmaxZH021459(TIP2-1);GmaxZH021593(NIP6-1);GmaxZH021994(--);GmaxZH025679(HIPP39);GmaxZH028269(PIP2-1);GmaxZH029328(PIP1-3);GmaxZH029437(TIP2-2);GmaxZH030459(TIP1-3);GmaxZH030812(PIP2-7);GmaxZH031544(TRG-31);GmaxZH032…	1.31841204020662e-09	2.11605132453162e-07
GO:0022803	passive transmembrane transporter activity	29	644	GmaxZH002212(TIP2-2);GmaxZH003222(SIP1-1);GmaxZH004809(HIPP09);GmaxZH005111(TRG-31);GmaxZH007543(AQP1);GmaxZH007692(NHL1);GmaxZH013026(PIP1-2);GmaxZH014195(TIP4-1);GmaxZH016131(CNGC4);GmaxZH021459(TIP2-1);GmaxZH021593(NIP6-1);GmaxZH021994(--);GmaxZH025679(HIPP39);GmaxZH028269(PIP2-1);GmaxZH029328(PIP1-3);GmaxZH029437(TIP2-2);GmaxZH030459(TIP1-3);GmaxZH030812(PIP2-7);GmaxZH031544(TRG-31);GmaxZH032…	1.31841204020662e-09	2.11605132453162e-07
GO:0046527	glucosyltransferase activity	20	321	GmaxZH003327(CESA2);GmaxZH004980(SUS6);GmaxZH007530(XTH32);GmaxZH017046(bshA);GmaxZH017060(--);GmaxZH021499(--);GmaxZH024166(CESA3);GmaxZH024845(SUS6);GmaxZH027948(--);GmaxZH028660(XTH8);GmaxZH030761(XTH31);GmaxZH031402(SUS6);GmaxZH032577(XTH32);GmaxZH033876(XTH9);GmaxZH040126(SUS6);GmaxZH043062(CESA3);GmaxZH043520(XTHB);GmaxZH044727(CESA2);GmaxZH045156(SUS6);GmaxZH055070(XTH10)	2.42535029507159e-09	3.11414977887192e-07
GO:0016209	antioxidant activity	24	514	GmaxZH004270(PER53);GmaxZH006044(PNC1);GmaxZH007752(PER3);GmaxZH012018(PER50);GmaxZH016499(PER3);GmaxZH021067(PER7);GmaxZH023357(PER54);GmaxZH026198(PER3);GmaxZH031388(PAO4);GmaxZH033855(PER3);GmaxZH033856(PER39);GmaxZH035221(PER16);GmaxZH037262(PER39);GmaxZH037639(PER61);GmaxZH040053(GSVIVT00023967001);GmaxZH040234(PER64);GmaxZH040551(PER26);GmaxZH044713(PER12);GmaxZH045069(PER47);GmaxZH046777(P…	1.81406118699383e-08	1.9410454700834e-06
GO:0016798	hydrolase activity, acting on glycosyl bonds	35	1040	GmaxZH000849(At2g43860);GmaxZH002730(At4g02290);GmaxZH003831(CML30);GmaxZH005177(ENGASE1);GmaxZH007058(GNS1);GmaxZH007530(XTH32);GmaxZH010802(BGAL16);GmaxZH011439(INVA);GmaxZH021065(guaA);GmaxZH021742(guaA);GmaxZH022015(CTL1);GmaxZH023726(BGAL12);GmaxZH024004(At5g34940);GmaxZH028660(XTH8);GmaxZH030068(At1g48930);GmaxZH030761(XTH31);GmaxZH032330(BGLU24);GmaxZH032577(XTH32);GmaxZH033876(XTH9);GmaxZ…	4.58553087823185e-08	4.20558689117836e-06
GO:0005215	transporter activity	71	3324	GmaxZH002212(TIP2-2);GmaxZH003222(SIP1-1);GmaxZH004104(AVT1C);GmaxZH004809(HIPP09);GmaxZH005111(TRG-31);GmaxZH006972(NPF3.1);GmaxZH007543(AQP1);GmaxZH007692(NHL1);GmaxZH007944(NPF4.6);GmaxZH010917(DTX14);GmaxZH013026(PIP1-2);GmaxZH014195(TIP4-1);GmaxZH014388(ST3);GmaxZH016131(CNGC4);GmaxZH018124(LAC7);GmaxZH018191(CAX3);GmaxZH018701(STC);GmaxZH019025(IRT1);GmaxZH019399(Bp10);GmaxZH019712(VATE);Gm…	9.77788605327158e-07	7.0033005719536e-05
GO:0009011	starch synthase activity	8	65	GmaxZH004980(SUS6);GmaxZH017046(bshA);GmaxZH021499(--);GmaxZH024845(SUS6);GmaxZH027948(--);GmaxZH031402(SUS6);GmaxZH040126(SUS6);GmaxZH045156(SUS6)	1.06126958618658e-06	7.0033005719536e-05
GO:0022857	transmembrane transporter activity	67	3078	GmaxZH002212(TIP2-2);GmaxZH003222(SIP1-1);GmaxZH004104(AVT1C);GmaxZH004809(HIPP09);GmaxZH005111(TRG-31);GmaxZH006972(NPF3.1);GmaxZH007543(AQP1);GmaxZH007692(NHL1);GmaxZH007944(NPF4.6);GmaxZH010917(DTX14);GmaxZH013026(PIP1-2);GmaxZH014195(TIP4-1);GmaxZH014388(ST3);GmaxZH016131(CNGC4);GmaxZH018124(LAC7);GmaxZH018191(CAX3);GmaxZH018701(STC);GmaxZH019025(IRT1);GmaxZH019399(Bp10);GmaxZH019712(VATE);Gm…	1.09085678690866e-06	7.0033005719536e-05
GO:0004553	hydrolase activity, hydrolyzing O-glycosyl compounds	30	953	GmaxZH000849(At2g43860);GmaxZH002730(At4g02290);GmaxZH003831(CML30);GmaxZH005177(ENGASE1);GmaxZH007058(GNS1);GmaxZH007530(XTH32);GmaxZH010802(BGAL16);GmaxZH011439(INVA);GmaxZH022015(CTL1);GmaxZH023726(BGAL12);GmaxZH028660(XTH8);GmaxZH030068(At1g48930);GmaxZH030761(XTH31);GmaxZH032330(BGLU24);GmaxZH032577(XTH32);GmaxZH033876(XTH9);GmaxZH037824(At3g15720);GmaxZH038591(BGAL5);GmaxZH039465(CML44);Gma…	1.69936774032205e-06	9.91812808442504e-05
GO:0004373	glycogen (starch) synthase activity	8	74	GmaxZH004980(SUS6);GmaxZH017046(bshA);GmaxZH021499(--);GmaxZH024845(SUS6);GmaxZH027948(--);GmaxZH031402(SUS6);GmaxZH040126(SUS6);GmaxZH045156(SUS6)	2.88648333182694e-06	0.000154426858252741
GO:0016157	sucrose synthase activity	7	54	GmaxZH004980(SUS6);GmaxZH017046(bshA);GmaxZH021499(--);GmaxZH024845(SUS6);GmaxZH031402(SUS6);GmaxZH040126(SUS6);GmaxZH045156(SUS6)	3.54973113781861e-06	0.000175302106959965
GO:0020037	heme binding	25	760	GmaxZH004270(PER53);GmaxZH005127(CYP90A1);GmaxZH006044(PNC1);GmaxZH007752(PER3);GmaxZH012018(PER50);GmaxZH013740(CYP82A3);GmaxZH016499(PER3);GmaxZH021067(PER7);GmaxZH023357(PER54);GmaxZH026198(PER3);GmaxZH029357(CYP87A3);GmaxZH033855(PER3);GmaxZH033856(PER39);GmaxZH035221(PER16);GmaxZH037262(PER39);GmaxZH037639(PER61);GmaxZH040053(GSVIVT00023967001);GmaxZH040234(PER64);GmaxZH040551(PER26);GmaxZH0…	5.97349688084431e-06	0.000273927499821575
Top 20 enriched GO terms in the bright orange module (Profile 0 and 9)
GO:0016491	oxidoreductase activity	163	4568	GmaxZH000760(CCD7);GmaxZH000821(CYP83B1);GmaxZH000966(At3g21360);GmaxZH002287(CYP87A3);GmaxZH002669(GA2OX2);GmaxZH002990(P4H10);GmaxZH003021(PETH);GmaxZH003529(At3g21360);GmaxZH003701(CYP78A5);GmaxZH003821(NIR1);GmaxZH004320(CYP93A3);GmaxZH004618(CIPK6);GmaxZH004634(ENOD55-2);GmaxZH004923(CIPK10);GmaxZH005311(CIPK3);GmaxZH005447(CYP716B1);GmaxZH005851(GA20OX2);GmaxZH005948(CYP71B36);GmaxZH006519(…	2.50452114066336e-13	1.97857170112405e-10
GO:0005506	iron ion binding	43	623	GmaxZH000821(CYP83B1);GmaxZH000966(At3g21360);GmaxZH002287(CYP87A3);GmaxZH003515(STN7);GmaxZH003529(At3g21360);GmaxZH003701(CYP78A5);GmaxZH004320(CYP93A3);GmaxZH005447(CYP716B1);GmaxZH005948(CYP71B36);GmaxZH007137(CYP93A3);GmaxZH007286(D27);GmaxZH007577(CYP76A2);GmaxZH008818(CYP711A1);GmaxZH011084(CYP78A5);GmaxZH012665(CYP716A15);GmaxZH013897(CYP711A1);GmaxZH014717(CYP714A1);GmaxZH017226(CYP78A3)…	4.59856803198459e-12	1.81643437263391e-09
GO:0016705	oxidoreductase activity, acting on paired donors, with incorporation or reduction of molecular oxygen	51	890	GmaxZH000821(CYP83B1);GmaxZH000966(At3g21360);GmaxZH002287(CYP87A3);GmaxZH003529(At3g21360);GmaxZH003701(CYP78A5);GmaxZH003821(NIR1);GmaxZH004320(CYP93A3);GmaxZH004618(CIPK6);GmaxZH004923(CIPK10);GmaxZH005311(CIPK3);GmaxZH005447(CYP716B1);GmaxZH005948(CYP71B36);GmaxZH007137(CYP93A3);GmaxZH007577(CYP76A2);GmaxZH008818(CYP711A1);GmaxZH011084(CYP78A5);GmaxZH011205(ATPK2);GmaxZH012665(CYP716A15);Gmax…	4.51844693152356e-11	1.18985769196787e-08
GO:0020037	heme binding	44	760	GmaxZH000821(CYP83B1);GmaxZH002287(CYP87A3);GmaxZH003701(CYP78A5);GmaxZH003821(NIR1);GmaxZH004320(CYP93A3);GmaxZH005447(CYP716B1);GmaxZH005948(CYP71B36);GmaxZH007137(CYP93A3);GmaxZH007577(CYP76A2);GmaxZH008818(CYP711A1);GmaxZH011084(CYP78A5);GmaxZH012665(CYP716A15);GmaxZH013897(CYP711A1);GmaxZH014717(CYP714A1);GmaxZH015529(PER25);GmaxZH017226(CYP78A3);GmaxZH017261(At3g61750);GmaxZH018325(AOS3);Gm…	7.34944722752789e-10	1.45151582743676e-07
GO:0046906	tetrapyrrole binding	45	795	GmaxZH000821(CYP83B1);GmaxZH002287(CYP87A3);GmaxZH003701(CYP78A5);GmaxZH003821(NIR1);GmaxZH004320(CYP93A3);GmaxZH005447(CYP716B1);GmaxZH005948(CYP71B36);GmaxZH007137(CYP93A3);GmaxZH007577(CYP76A2);GmaxZH008818(CYP711A1);GmaxZH011084(CYP78A5);GmaxZH012665(CYP716A15);GmaxZH013897(CYP711A1);GmaxZH014717(CYP714A1);GmaxZH015529(PER25);GmaxZH017226(CYP78A3);GmaxZH017261(At3g61750);GmaxZH018325(AOS3);Gm…	9.50704497871144e-10	1.50211310663641e-07
GO:0015294	solute:cation symporter activity	23	319	GmaxZH001872(PLT6);GmaxZH002231(NPF6.3);GmaxZH003272(SUC1);GmaxZH004827(NPF8.1);GmaxZH007359(NPF5.2);GmaxZH008657(NPF4.6);GmaxZH010084(OCT3);GmaxZH011541(CAT6);GmaxZH013748(NPF4.6);GmaxZH016882(NPF1.2);GmaxZH019019(PHT1-9);GmaxZH023248(INT4);GmaxZH029151(STP13);GmaxZH029513(NPF7.3);GmaxZH029736(PLT6);GmaxZH033932(PLT4);GmaxZH034651(PHT1-11);GmaxZH037920(MSSP2);GmaxZH039917(PHT1-3);GmaxZH044657(SU…	2.05947147130497e-07	2.71163743721821e-05
GO:0015293	symporter activity	23	323	GmaxZH001872(PLT6);GmaxZH002231(NPF6.3);GmaxZH003272(SUC1);GmaxZH004827(NPF8.1);GmaxZH007359(NPF5.2);GmaxZH008657(NPF4.6);GmaxZH010084(OCT3);GmaxZH011541(CAT6);GmaxZH013748(NPF4.6);GmaxZH016882(NPF1.2);GmaxZH019019(PHT1-9);GmaxZH023248(INT4);GmaxZH029151(STP13);GmaxZH029513(NPF7.3);GmaxZH029736(PLT6);GmaxZH033932(PLT4);GmaxZH034651(PHT1-11);GmaxZH037920(MSSP2);GmaxZH039917(PHT1-3);GmaxZH044657(SU…	2.5690347964261e-07	2.89933927025231e-05
GO:0015295	solute:proton symporter activity	21	284	GmaxZH001872(PLT6);GmaxZH002231(NPF6.3);GmaxZH004827(NPF8.1);GmaxZH007359(NPF5.2);GmaxZH008657(NPF4.6);GmaxZH010084(OCT3);GmaxZH011541(CAT6);GmaxZH013748(NPF4.6);GmaxZH016882(NPF1.2);GmaxZH019019(PHT1-9);GmaxZH023248(INT4);GmaxZH029151(STP13);GmaxZH029513(NPF7.3);GmaxZH029736(PLT6);GmaxZH033932(PLT4);GmaxZH034651(PHT1-11);GmaxZH037920(MSSP2);GmaxZH039917(PHT1-3);GmaxZH046626(CAT6);GmaxZH053227(NP…	4.57538265083036e-07	4.51819036769498e-05
GO:0042910	xenobiotic transmembrane transporter activity	30	573	GmaxZH000077(DTX51);GmaxZH001872(PLT6);GmaxZH007607(ABCG39);GmaxZH008079(At1g54730);GmaxZH008983(PDR1);GmaxZH010084(OCT3);GmaxZH012417(ABCC6);GmaxZH014080(PDR1);GmaxZH014711(ABCB19);GmaxZH017686(DTX16);GmaxZH019019(PHT1-9);GmaxZH020184(ABCG11);GmaxZH020467(ABCC9);GmaxZH023248(INT4);GmaxZH028420(ABCC10);GmaxZH029151(STP13);GmaxZH029736(PLT6);GmaxZH033932(PLT4);GmaxZH034651(PHT1-11);GmaxZH036961(DT…	2.9842047114408e-06	0.000261946858004248
GO:0015144	carbohydrate transmembrane transporter activity	26	493	GmaxZH001872(PLT6);GmaxZH003272(SUC1);GmaxZH003983(IPT3);GmaxZH007607(ABCG39);GmaxZH008079(At1g54730);GmaxZH008983(PDR1);GmaxZH010084(OCT3);GmaxZH012417(ABCC6);GmaxZH014080(PDR1);GmaxZH014711(ABCB19);GmaxZH019019(PHT1-9);GmaxZH020184(ABCG11);GmaxZH020467(ABCC9);GmaxZH023248(INT4);GmaxZH028420(ABCC10);GmaxZH029151(STP13);GmaxZH029736(PLT6);GmaxZH033932(PLT4);GmaxZH034651(PHT1-11);GmaxZH037920(MSSP…	1.18642461092947e-05	0.0008364271355273
GO:0015318	inorganic molecular entity transmembrane transporter activity	71	2069	GmaxZH001872(PLT6);GmaxZH002231(NPF6.3);GmaxZH002308(HMA5);GmaxZH003272(SUC1);GmaxZH003289(ROQ1);GmaxZH004827(NPF8.1);GmaxZH006519(IRX12);GmaxZH007359(NPF5.2);GmaxZH007606(ABCG39);GmaxZH007607(ABCG39);GmaxZH008079(At1g54730);GmaxZH008657(NPF4.6);GmaxZH008983(PDR1);GmaxZH010084(OCT3);GmaxZH010292(AZG2);GmaxZH010790(At1g77330);GmaxZH011541(CAT6);GmaxZH012193(At3g43660);GmaxZH012417(ABCC6);GmaxZH013…	1.25242393889348e-05	0.0008364271355273
GO:0051119	sugar transmembrane transporter activity	24	436	GmaxZH001872(PLT6);GmaxZH003983(IPT3);GmaxZH007607(ABCG39);GmaxZH008079(At1g54730);GmaxZH008983(PDR1);GmaxZH010084(OCT3);GmaxZH012417(ABCC6);GmaxZH014080(PDR1);GmaxZH014711(ABCB19);GmaxZH019019(PHT1-9);GmaxZH020184(ABCG11);GmaxZH020467(ABCC9);GmaxZH023248(INT4);GmaxZH028420(ABCC10);GmaxZH029151(STP13);GmaxZH029736(PLT6);GmaxZH033932(PLT4);GmaxZH034651(PHT1-11);GmaxZH037920(MSSP2);GmaxZH039917(PHT…	1.27052223118071e-05	0.0008364271355273
GO:0015291	secondary active transmembrane transporter activity	31	654	GmaxZH000077(DTX51);GmaxZH001872(PLT6);GmaxZH002231(NPF6.3);GmaxZH003272(SUC1);GmaxZH004827(NPF8.1);GmaxZH007359(NPF5.2);GmaxZH008657(NPF4.6);GmaxZH010084(OCT3);GmaxZH011541(CAT6);GmaxZH013748(NPF4.6);GmaxZH016882(NPF1.2);GmaxZH017686(DTX16);GmaxZH019019(PHT1-9);GmaxZH023248(INT4);GmaxZH029151(STP13);GmaxZH029513(NPF7.3);GmaxZH029736(PLT6);GmaxZH033932(PLT4);GmaxZH034651(PHT1-11);GmaxZH036933(NCL…	1.48539110261474e-05	0.000902660746973575
GO:0015075	ion transmembrane transporter activity	74	2204	GmaxZH001872(PLT6);GmaxZH002231(NPF6.3);GmaxZH002308(HMA5);GmaxZH003272(SUC1);GmaxZH003289(ROQ1);GmaxZH004827(NPF8.1);GmaxZH006519(IRX12);GmaxZH007359(NPF5.2);GmaxZH007606(ABCG39);GmaxZH007607(ABCG39);GmaxZH008079(At1g54730);GmaxZH008657(NPF4.6);GmaxZH008983(PDR1);GmaxZH010084(OCT3);GmaxZH010292(AZG2);GmaxZH010790(At1g77330);GmaxZH011541(CAT6);GmaxZH012193(At3g43660);GmaxZH012417(ABCC6);GmaxZH013…	1.69573539728503e-05	0.000956879259896552
GO:0015103	inorganic anion transmembrane transporter activity	27	556	GmaxZH001872(PLT6);GmaxZH007606(ABCG39);GmaxZH007607(ABCG39);GmaxZH008079(At1g54730);GmaxZH008983(PDR1);GmaxZH010292(AZG2);GmaxZH012417(ABCC6);GmaxZH014080(PDR1);GmaxZH014711(ABCB19);GmaxZH015040(AZG2);GmaxZH019019(PHT1-9);GmaxZH020184(ABCG11);GmaxZH020467(ABCC9);GmaxZH023248(INT4);GmaxZH025044(SULTR3;5);GmaxZH028420(ABCC10);GmaxZH029151(STP13);GmaxZH029736(PLT6);GmaxZH033932(PLT4);GmaxZH034651(P…	3.4502452932358e-05	0.00181712918777086
GO:0008028	monocarboxylic acid transmembrane transporter activity	24	468	GmaxZH001872(PLT6);GmaxZH007607(ABCG39);GmaxZH008079(At1g54730);GmaxZH008983(PDR1);GmaxZH011541(CAT6);GmaxZH012417(ABCC6);GmaxZH014080(PDR1);GmaxZH014711(ABCB19);GmaxZH019019(PHT1-9);GmaxZH020184(ABCG11);GmaxZH020467(ABCC9);GmaxZH023248(INT4);GmaxZH028420(ABCC10);GmaxZH029151(STP13);GmaxZH029736(PLT6);GmaxZH033932(PLT4);GmaxZH034651(PHT1-11);GmaxZH037920(MSSP2);GmaxZH039917(PHT1-3);GmaxZH043191(A…	3.97015549662268e-05	0.00196026427645745
GO:0004316	3-oxoacyl-[acyl-carrier-protein] reductase (NADPH) activity	14	193	GmaxZH015097(TIC32B);GmaxZH018061(At5g06060);GmaxZH018864(SDR1);GmaxZH020472(CLKR27);GmaxZH025910(SDR2a);GmaxZH031000(CCR1);GmaxZH031490(At5g06060);GmaxZH031491(At5g06060);GmaxZH035150(CER3);GmaxZH044862(TIC32);GmaxZH044864(TIC32);GmaxZH045874(CER3);GmaxZH050014(SDR2a);GmaxZH052966(Os04g0179200)	4.54060924424601e-05	0.0020208005253616
GO:0008678	2-deoxy-D-gluconate 3-dehydrogenase activity	13	169	GmaxZH015097(TIC32B);GmaxZH018061(At5g06060);GmaxZH018864(SDR1);GmaxZH020472(CLKR27);GmaxZH020903(CAD1);GmaxZH025910(SDR2a);GmaxZH031000(CCR1);GmaxZH031490(At5g06060);GmaxZH031491(At5g06060);GmaxZH044862(TIC32);GmaxZH044864(TIC32);GmaxZH050014(SDR2a);GmaxZH052966(Os04g0179200)	4.60435562740617e-05	0.0020208005253616
GO:0015114	phosphate ion transmembrane transporter activity	22	416	GmaxZH001872(PLT6);GmaxZH007606(ABCG39);GmaxZH007607(ABCG39);GmaxZH008079(At1g54730);GmaxZH008983(PDR1);GmaxZH012417(ABCC6);GmaxZH014080(PDR1);GmaxZH014711(ABCB19);GmaxZH019019(PHT1-9);GmaxZH020184(ABCG11);GmaxZH020467(ABCC9);GmaxZH023248(INT4);GmaxZH028420(ABCC10);GmaxZH029151(STP13);GmaxZH029736(PLT6);GmaxZH033932(PLT4);GmaxZH034651(PHT1-11);GmaxZH037920(MSSP2);GmaxZH039917(PHT1-3);GmaxZH043191…	5.24137471992377e-05	0.00217930843617883
GO:0003824	catalytic activity	470	20690	GmaxZH000019(CAS1);GmaxZH000138(RPPL1);GmaxZH000270(LYK3);GmaxZH000278(At1g48100);GmaxZH000704(--);GmaxZH000708(--);GmaxZH000760(CCD7);GmaxZH000821(CYP83B1);GmaxZH000926(UGT83A1);GmaxZH000966(At3g21360);GmaxZH001038(BHLH94);GmaxZH002059(--);GmaxZH002088(PUB30);GmaxZH002107(TUBA2);GmaxZH002235(INVA);GmaxZH002287(CYP87A3);GmaxZH002308(HMA5);GmaxZH002598(--);GmaxZH002669(GA2OX2);GmaxZH002893(PUB19);…	6.48510360347295e-05	0.00247987556277326
Top 20 enriched GO terms in the bright green module (Profile 3)
GO:0071555	cell wall organization	10	267	GmaxZH001499(PECS-2.1);GmaxZH009430(PME33);GmaxZH009972(COB);GmaxZH023853(PME12);GmaxZH025454(PME33);GmaxZH044776(--);GmaxZH049151(XTH33);GmaxZH050605(COB);GmaxZH052461(PME8);GmaxZH052864(PME15)	3.15553501561911e-06	0.00251811694246405
GO:0045229	external encapsulating structure organization	10	293	GmaxZH001499(PECS-2.1);GmaxZH009430(PME33);GmaxZH009972(COB);GmaxZH023853(PME12);GmaxZH025454(PME33);GmaxZH044776(--);GmaxZH049151(XTH33);GmaxZH050605(COB);GmaxZH052461(PME8);GmaxZH052864(PME15)	7.15795982456429e-06	0.00259989759679789
GO:0019333	denitrification pathway	3	8	GmaxZH001865(LAC11);GmaxZH029768(LAC11);GmaxZH035014(AAO)	9.77405111578155e-06	0.00259989759679789
GO:0042545	cell wall modification	7	151	GmaxZH001499(PECS-2.1);GmaxZH009430(PME33);GmaxZH023853(PME12);GmaxZH025454(PME33);GmaxZH049151(XTH33);GmaxZH052461(PME8);GmaxZH052864(PME15)	2.55353940624221e-05	0.0050943111154532
GO:0004553	hydrolase activity, hydrolyzing O-glycosyl compounds	20	953	GmaxZH000872(XYL1);GmaxZH008592(BGAL3);GmaxZH008790(XYN1);GmaxZH013874(XYN1);GmaxZH016648(exgA);GmaxZH016799(BGAL1);GmaxZH018913(CML30);GmaxZH022363(At1g80170);GmaxZH025853(MAN6);GmaxZH027157(BACOVA_02659);GmaxZH031799(XTH16);GmaxZH038821(XYN1);GmaxZH041171(At1g32860);GmaxZH041642(GN1);GmaxZH047887(XTH16);GmaxZH049151(XTH33);GmaxZH049172(At1g80170);GmaxZH050077(MAN6);GmaxZH052084(XTH1);GmaxZH0556…	9.11713300355379e-08	3.51009620636821e-05
GO:0016798	hydrolase activity, acting on glycosyl bonds	20	1040	GmaxZH000872(XYL1);GmaxZH008592(BGAL3);GmaxZH008790(XYN1);GmaxZH013874(XYN1);GmaxZH016648(exgA);GmaxZH016799(BGAL1);GmaxZH018913(CML30);GmaxZH022363(At1g80170);GmaxZH025853(MAN6);GmaxZH027157(BACOVA_02659);GmaxZH031799(XTH16);GmaxZH038821(XYN1);GmaxZH041171(At1g32860);GmaxZH041642(GN1);GmaxZH047887(XTH16);GmaxZH049151(XTH33);GmaxZH049172(At1g80170);GmaxZH050077(MAN6);GmaxZH052084(XTH1);GmaxZH0556…	3.64533252427618e-07	7.01726510923164e-05
GO:0005507	copper ion binding	10	284	GmaxZH001865(LAC11);GmaxZH011661(UCC1);GmaxZH013596(Bp10);GmaxZH028630(AO1);GmaxZH029768(LAC11);GmaxZH030032(Bp10);GmaxZH032051(Bp10);GmaxZH035014(AAO);GmaxZH045323(Bp10);GmaxZH047845(Bp10)	2.07790244629109e-06	0.00020955372072262
GO:0003824	catalytic activity	134	20690	GmaxZH000872(XYL1);GmaxZH001456(IRK);GmaxZH001499(PECS-2.1);GmaxZH001686(SBT5.4);GmaxZH001692(HMG3);GmaxZH001865(LAC11);GmaxZH001881(CYP90B1);GmaxZH002028(PTEN2A);GmaxZH003194(FES1);GmaxZH004765(BHLH93);GmaxZH004917(GSVIVT00023967001);GmaxZH004987(UGP);GmaxZH005843(SBTI1.1);GmaxZH005975(GT5);GmaxZH006628(FKBP65);GmaxZH007619(PAP22);GmaxZH008180(CYP19-3);GmaxZH008454(XCP2);GmaxZH008455(XCP2);GmaxZ…	2.17718151400125e-06	0.00020955372072262
GO:0016662	oxidoreductase activity, acting on other nitrogenous compounds as donors, cytochrome as acceptor	3	8	GmaxZH001865(LAC11);GmaxZH029768(LAC11);GmaxZH035014(AAO)	7.01064854664254e-06	0.000449849948409563
GO:0050304	nitrous-oxide reductase activity	3	8	GmaxZH001865(LAC11);GmaxZH029768(LAC11);GmaxZH035014(AAO)	7.01064854664254e-06	0.000449849948409563
GO:0005375	copper ion transmembrane transporter activity	8	241	GmaxZH001865(LAC11);GmaxZH013596(Bp10);GmaxZH029768(LAC11);GmaxZH030032(Bp10);GmaxZH032051(Bp10);GmaxZH035014(AAO);GmaxZH045323(Bp10);GmaxZH047845(Bp10)	3.39225678845952e-05	0.00186574123365274
GO:0004601	peroxidase activity	8	263	GmaxZH004917(GSVIVT00023967001);GmaxZH016500(PER3);GmaxZH021234(PNC2);GmaxZH023667(PER16);GmaxZH025892(PNC1);GmaxZH044992(PER66);GmaxZH045799(PER16);GmaxZH056085(PNC1)	6.27354525025631e-05	0.00301914365168585
GO:0030599	pectinesterase activity	6	140	GmaxZH001499(PECS-2.1);GmaxZH009430(PME33);GmaxZH023853(PME12);GmaxZH025454(PME33);GmaxZH052461(PME8);GmaxZH052864(PME15)	8.27470028286665e-05	0.00346423583099546
GO:0016684	oxidoreductase activity, acting on peroxide as acceptor	8	277	GmaxZH004917(GSVIVT00023967001);GmaxZH016500(PER3);GmaxZH021234(PNC2);GmaxZH023667(PER16);GmaxZH025892(PNC1);GmaxZH044992(PER66);GmaxZH045799(PER16);GmaxZH056085(PNC1)	8.99801514544274e-05	0.00346423583099546
GO:0020037	heme binding	13	760	GmaxZH001881(CYP90B1);GmaxZH004917(GSVIVT00023967001);GmaxZH016500(PER3);GmaxZH021234(PNC2);GmaxZH023667(PER16);GmaxZH025892(PNC1);GmaxZH029753(CYP90B1);GmaxZH039567(TED7);GmaxZH043631(CYP94B1);GmaxZH044992(PER66);GmaxZH045799(PER16);GmaxZH051927(CYP94B1);GmaxZH056085(PNC1)	0.000142956865601078	0.00500349029603772
GO:0016661	oxidoreductase activity, acting on other nitrogenous compounds as donors	3	22	GmaxZH001865(LAC11);GmaxZH029768(LAC11);GmaxZH035014(AAO)	0.000182985169102408	0.00587077417536891
GO:0046906	tetrapyrrole binding	13	795	GmaxZH001881(CYP90B1);GmaxZH004917(GSVIVT00023967001);GmaxZH016500(PER3);GmaxZH021234(PNC2);GmaxZH023667(PER16);GmaxZH025892(PNC1);GmaxZH029753(CYP90B1);GmaxZH039567(TED7);GmaxZH043631(CYP94B1);GmaxZH044992(PER66);GmaxZH045799(PER16);GmaxZH051927(CYP94B1);GmaxZH056085(PNC1)	0.00022138806925045	0.00655649282010948
GO:0016762	xyloglucan:xyloglucosyl transferase activity	4	68	GmaxZH031799(XTH16);GmaxZH047887(XTH16);GmaxZH049151(XTH33);GmaxZH052084(XTH1)	0.000401507904224331	0.0110414673661691
GO:0008808	cardiolipin synthase activity	3	31	GmaxZH016804(PLDALPHA4);GmaxZH021373(PLDALPHA4);GmaxZH040498(PLDALPHA4)	0.000516519702499036	0.012428755341383
GO:0048046	apoplast	5	95	GmaxZH031799(XTH16);GmaxZH047887(XTH16);GmaxZH049151(XTH33);GmaxZH052084(XTH1);GmaxZH052227(AMC9)	5.43028258718433e-05	0.00733088149269884

## Sheet: Table S9
Table S9. Ion transport and detoxification-related DEGs in Profile 12 and 19 clusters.
Gene_ID	Symbol	Sb0-1_fpkm	Sb0-2_fpkm	Sb0-3_fpkm	Sb1-1_fpkm	Sb1-2_fpkm	Sb1-3_fpkm	Sb10-1_fpkm	Sb10-2_fpkm	Sb10-3_fpkm	Sb50-1_fpkm	Sb50-2_fpkm	Sb50-3_fpkm	Description
GmaxZH020177	2ODD19	0.634	0.175	0.536	0.228	0.396	0.701	0.91	1.061	1.036	2.083	1.052	1.881	XP_003531023.1 2-oxoglutarate-dependent dioxygenase 19 [Glycine max]
GmaxZH030770	4CLL7	7.361	4.321	3.056	7.811	5.094	10.804	8.065	9.766	11.495	11.524	9.666	10.265	KAG4994566.1 hypothetical protein JHK86_031393 [Glycine max]
GmaxZH040114	AAE5	2.113	1.552	1.357	2.398	2.052	3.518	4.096	2.723	3.587	6.186	3.784	3.304	XP_003544953.1 probable acyl-activating enzyme 6 [Glycine max]
GmaxZH054150	AAO	1.678	1.181	1.386	1.581	3.421	1.578	2.934	1.845	1.756	4.875	4.52	5.464	RZB42463.1 L-ascorbate oxidase [Glycine soja]
GmaxZH054151	AAO	0.501	0.653	0.687	0.886	1.416	1.322	1.247	1.177	1.192	3.784	3.064	3.727	RZB42463.1 L-ascorbate oxidase [Glycine soja]
GmaxZH005573	AAP7	1.417	0.904	1.211	1.769	1.829	1.585	4.056	2.196	1.825	2.935	2.57	3.159	RZC27476.1 putative amino acid permease 7 isoform B [Glycine soja]
GmaxZH015205	ABCA2	11.373	7.42	4.949	9.304	9.004	11.88	44.962	41.07	14.585	36.63	40.942	39.517	XP_003527064.1 ABC transporter A family member 2 [Glycine max]
GmaxZH015206	ABCA7	3.876	2.697	1.301	2.989	3.349	4.641	27.378	25.007	9.23	25.84	26.112	25.391	KHN30818.1 ABC transporter A family member 7 [Glycine soja]
GmaxZH002648	ABCB11	19.887	13.654	13.553	20.102	19.964	21.985	38.758	25.606	17.326	35.071	36.556	32.485	XP_028192308.1 ABC transporter B family member 4-like [Glycine soja]
GmaxZH035427	ABCB11	1.806	2.23	1.502	1.358	1.713	2.742	27.736	20.466	4.771	30.059	39.493	28.597	KAG5112743.1 hypothetical protein JHK82_036012 [Glycine max]
GmaxZH045600	ABCB11	0.329	0.746	0.886	0.47	0.396	0.548	25.843	15.448	2.237	23.509	20.09	25.921	XP_014625441.1 ABC transporter B family member 11 [Glycine max]
GmaxZH000088	ABCB8	3.863	3.939	2.593	3.74	5.297	5.419	6.235	6.503	10.29	10.007	7.155	8.356	KAH1264100.1 putative ABC transporter B family member 8 [Glycine max]
GmaxZH005523	ABCB11	2.339	1.409	0.599	2.045	2.332	1.995	5.732	4.581	2.73	3.877	3.273	3.831	RZC27397.1 ABC transporter C family member 3 [Glycine soja]
GmaxZH005525	ABCC3	2.15	1.388	0.915	1.466	1.854	1.421	5.066	4.692	1.778	4.084	4.561	4.374	XP_028221569.1 ABC transporter C family member 3-like isoform X2 [Glycine soja]
GmaxZH048641	ABCC3	17.64	10.393	7.845	17.162	16.069	16.566	23.736	20.168	20.923	31.971	24.35	29.355	KAG5093991.1 hypothetical protein JHK84_049579 [Glycine max]
GmaxZH006746	ABCC9	14.254	12.656	12.157	15.304	12.457	12.057	23.932	19.635	11.994	30.026	24.662	29.113	XP_003521031.1 putative ABC transporter C family member 15 [Glycine max]
GmaxZH017912	ABCC9	26.432	31.113	20.589	37.159	40.906	34.283	64.042	55.027	42.155	52.265	51.425	60.428	XP_003530102.2 putative ABC transporter C family member 15 [Glycine max]
GmaxZH036924	ABCG10	0.381	0.217	0.462	0.357	0.359	0.604	1.568	0.479	0.379	1.21	1.104	0.949	XP_003543218.2 ABC transporter G family member 10 [Glycine max]
GmaxZH034688	ABCG11	5.297	8.761	12.79	6.368	6.882	7.931	18.81	10.949	17.419	21.293	28.703	21.363	XP_003541427.1 ABC transporter G family member 1 [Glycine max]
GmaxZH007447	ABCG20	10.096	4.724	3.452	13.049	12.556	12.981	19.609	14.812	16.63	23.678	16.292	21.071	XP_028225746.1 ABC transporter G family member 20-like [Glycine soja]
GmaxZH052752	ABCG20	1.136	1.098	1.698	1.76	2.13	1.885	3.902	3.112	1.879	3.713	4.12	3.372	XP_003553533.1 ABC transporter G family member 20 [Glycine max]
GmaxZH000976	ABCG21	8.538	5.543	1.422	8.046	5.719	8.712	10.583	7.653	7.849	19.559	11.406	14.748	XP_006573283.1 ABC transporter G family member 21 [Glycine max]
GmaxZH011016	ABCG32	1.549	1.361	2.205	2.186	2.196	3.203	3.908	2.838	1.754	4.272	2.876	3.807	XP_003524521.1 ABC transporter G family member 32 isoform X1 [Glycine max]
GmaxZH046356	ABCG32	0.028	0.068	0.059	0.119	0.14	0.072	0.211	0.138	0.19	0.35	0.584	0.385	XP_003549791.1 ABC transporter G family member 32 [Glycine max]
GmaxZH012757	ACX2	11.873	8.615	10.03	16.5	13.178	13.402	15.868	20.493	16.298	24.119	19.64	19.422	XP_003525063.1 acyl-coenzyme A oxidase 2, peroxisomal [Glycine max]
GmaxZH031971	ADH1	0.146	0.188	0.456	0.167	0.181	0.465	1.141	0.937	1.035	2.205	2.438	2.164	KAG4984922.1 hypothetical protein JHK86_032613 [Glycine max]
GmaxZH032703	aifA	55.039	60.174	54.883	39.036	35.826	63.285	159.052	129.552	95.106	150.232	235.301	195.129	NP_001241080.1 uncharacterized protein LOC100813980 [Glycine max]
GmaxZH006376	AKR4C9	59.129	63.154	68.964	68.856	48.268	65.137	167.992	136.577	78.386	139.396	184.594	189.704	KAG5042523.1 hypothetical protein JHK87_006438 [Glycine soja]
GmaxZH002891	ALDH2B7	9.581	6.666	7.631	7.209	7.601	7.922	11.257	10.809	14.687	15.46	15.035	18.072	NP_001354106.1 aldehyde dehydrogenase family 2 member B2 [Glycine max]
GmaxZH035957	ALDH2B7	20.58	14.014	8.339	16.335	31.208	26.116	19.375	16.847	50.622	40.138	37.253	23.859	NP_001354112.1 aldehyde dehydrogenase family 2 member B6 [Glycine max]
GmaxZH010813	ALDH3H1	17.576	9.37	8.799	13.507	18.959	17.195	16.711	11.882	22.288	37.308	28.076	29.02	XP_028230149.1 aldehyde dehydrogenase family 3 member H1-like [Glycine soja]
GmaxZH014472	ALDH3H1	15.338	12.142	9.579	14.231	11.741	15.788	23.913	22.286	14.311	30.12	32.004	27.542	NP_001354086.1 aldehyde dehydrogenase family 3 member H2 [Glycine max]
GmaxZH019539	ALDH3I1	6.247	4.14	3.871	7.349	9.05	8.159	8.053	7.254	7.117	13.902	12.409	13.441	NP_001354093.1 aldehyde dehydrogenase family 3 member I1 [Glycine max]
GmaxZH008646	AOS1	0	0	0.054	0.16	0	0	0.818	0.54	0.363	1.59	1.184	0.724	XP_028227598.1 allene oxide synthase 1, chloroplastic-like [Glycine soja]
GmaxZH009488	AOX1	2.626	7.29	5.537	5.186	2.999	5.814	30.976	13.996	4.28	22.424	38.134	41.508	NP_001236166.2 ubiquinol oxidase 1, mitochondrial [Glycine max]
GmaxZH014473	APXT	7.144	9.934	10.55	12.268	6.771	13.653	19.754	12.77	8.949	18.703	16.057	22.352	XP_003526639.1 probable L-ascorbate peroxidase 6, chloroplastic/mitochondrial isoform X2 [Glycine max]
GmaxZH009460	AS1	0.108	0.064	0.226	3.701	0.292	0.48	25.857	9.061	2.95	50.45	41.831	75.597	XP_003522849.1 polyphenol oxidase, chloroplastic [Glycine max]
GmaxZH016121	AS1	0.036	0.098	0.028	0.17	0.065	0	0.708	0.179	0.14	2.357	1.326	2.307	XP_028237952.1 polyphenol oxidase, chloroplastic-like [Glycine soja]
GmaxZH040953	AS1	8.089	11.111	11.217	3.007	4.933	6.152	70.377	55.445	43.243	112.8	107.212	95.447	XP_040865836.1 polyphenol oxidase, chloroplastic-like [Glycine max]
GmaxZH040954	AS1	9.579	2.672	1.971	7.659	5.214	7.443	56.663	44.452	26.336	161.304	89.58	124.09	XP_003545882.1 polyphenol oxidase A1, chloroplastic [Glycine max]
GmaxZH024622	At1g06620	1.496	1.003	0.453	1.75	2.002	1.196	1.058	1.108	2.332	2.746	2.176	2.313	RZB92063.1 1-aminocyclopropane-1-carboxylate oxidase-like 1 isoform A [Glycine soja]
GmaxZH024623	At1g06620	25.154	16.858	11.183	21.679	20.598	18.885	27.165	28.166	27.757	36.998	35.956	40.65	XP_003534014.1 1-aminocyclopropane-1-carboxylate oxidase homolog 1 [Glycine max]
GmaxZH041823	At1g34300	2.602	1.448	1.103	2.047	2.443	2.779	5.687	4.375	2.916	5.356	6.297	4.819	KAG4946424.1 hypothetical protein JHK87_042431 [Glycine soja]
GmaxZH053368	At1g54730	1.925	2.969	4.602	3.303	3.87	4.703	5.493	6.554	9.436	10.104	10.618	12.357	XP_003553740.4 sugar transporter ERD6-like 5 [Glycine max]
GmaxZH033888	At2g19130	2.529	2.648	2.268	2.594	2.301	3.443	6.116	4.347	2.928	4.249	5.366	5.875	XP_025980511.1 G-type lectin S-receptor-like serine/threonine-protein kinase At2g19130 [Glycine max]
GmaxZH007204	At2g48020	1.011	0.795	1.025	2.052	2.251	1.034	1.303	1.867	2.872	3.174	3.52	2.256	KAG4916053.1 hypothetical protein JHK87_053610 [Glycine soja]
GmaxZH020585	At3g13620	10.566	7.457	10.268	6.408	7.501	9.191	19.77	12.642	10.932	22.123	22.465	19.512	XP_028243543.1 probable polyamine transporter At3g13620 [Glycine soja]
GmaxZH046666	At3g50280	4.234	3.133	3.253	3.433	3.388	5.738	6.552	5.438	4.722	7.288	7.574	7.409	XP_003549969.1 protein ENHANCED PSEUDOMONAS SUSCEPTIBILITY 1 [Glycine max]
GmaxZH032797	At4g03230	1.61	1.156	1.356	1.739	3.215	1.907	2.814	1.172	2.47	5.518	4.997	3.563	XP_006592402.1 G-type lectin S-receptor-like serine/threonine-protein kinase At4g03230 isoform X1 [Glycine max]
GmaxZH036568	ATL40	3.002	1.834	1.855	2.034	3.863	4.592	5.788	4.295	3.825	6.574	7.01	7.147	XP_003543013.1 E3 ubiquitin-protein ligase ATL41 [Glycine max]
GmaxZH014763	AZG1	5.444	4.918	4.637	4.561	4.623	6.18	8.209	10.129	8.268	10.502	9.508	10.26	XP_025984676.1 adenine/guanine permease AZG1 [Glycine max]
GmaxZH054925	BAT1	1.36	1.022	1.215	2.013	1.368	2.109	5.896	3.813	2.351	3.681	5.869	6.618	XP_003555256.1 amino-acid permease BAT1 homolog isoform X1 [Glycine max]
MSTRG.35430	CAM1-1	0.422	0.474	1.408	0.988	0.572	0.759	6.093	3.548	1.937	4.508	6.236	5.802	calmodulin-1 [Glycine max]
GmaxZH020742	CAT1	1.432	2.132	4.265	2.347	2.145	2.273	6.043	5.214	4.653	11.692	9.128	13.279	XP_003531311.1 cationic amino acid transporter 1 [Glycine max]
MSTRG.8095	CBDAS2	3.951	1.018	2.456	0.659	0.706	3.415	131.079	78.915	20.934	170.723	159.582	152.214	berberine bridge enzyme-like 28 [Glycine max]
GmaxZH021600	CCR1	27.724	18.66	11.182	31.088	25.199	31.908	39.482	29.955	24.907	42.069	32.506	48.387	XP_003531735.1 cinnamoyl-CoA reductase 1 [Glycine max]
GmaxZH036525	CIPK12	2.258	1.712	0.998	3.216	2.239	2.442	5.762	3.647	2.887	4.94	3.4	4.509	XP_003542982.1 CBL-interacting serine/threonine-protein kinase 12 [Glycine max]
GmaxZH045735	CKX3	0.694	0.917	0.43	1.025	0.395	1.2	1.719	2.31	1.939	2.126	3.287	1.162	XP_028210146.1 cytokinin dehydrogenase 3-like [Glycine soja]
GmaxZH031934	CKX6	1.338	0.893	1.059	0.853	1.343	1.253	2.721	1.306	0.959	3.788	2.991	3.008	XP_028194926.1 cytokinin dehydrogenase 6-like [Glycine soja]
MSTRG.4738	CML8	3.575	5.1	4.388	2.661	2.896	5.272	23.614	22.027	6.552	19.935	25.451	19.275	calmodulin-1 [Glycine max]
GmaxZH028675	CRK26	1.081	1.113	0.976	1.828	1.689	1.168	2.592	3.026	2.509	4.405	3.854	4.681	XP_006589610.1 cysteine-rich receptor-like protein kinase 26 [Glycine max]
GmaxZH007973	CSP41B	0.233	0.209	0.329	0.524	0.295	0.287	1.367	0.83	0.54	0.86	1.443	1.034	NP_001242018.2 Chloroplast stem-loop binding protein of 41 kDa b, chloroplastic-like [Glycine max]
GmaxZH016091	CXXS1	1.58	2.33	3.631	5.813	4.584	0.232	6.617	13.393	23.985	11.835	6.67	5.77	NP_001237912.2 Thioredoxin-like protein CXXS1-like [Glycine max]
GmaxZH047521	CYP711A1	7.627	3.688	4.677	6.517	9.858	7.3	10.031	10.397	7.258	12.437	16.912	11.748	XP_003549345.1 cytochrome P450 711A1 [Glycine max]
GmaxZH020703	CYP716A17	3.375	1.782	1.52	3.861	3.215	3.44	4.074	3.925	4.367	7.496	4.838	7.174	KAG5000019.1 hypothetical protein JHK87_021091 [Glycine soja]
GmaxZH046405	CYP71AN24	19.116	11.879	3.36	24.315	26.109	24.31	30.33	23.638	32.04	56.395	32.063	40.331	XP_003549825.1 cytochrome P450 71A1 [Glycine max]
GmaxZH020853	CYP71AU50	0.15	0.336	0.235	1.192	0.405	1.038	17.654	8.179	2.061	26.236	23.767	30.613	XP_028244832.1 cytochrome P450 CYP736A12-like isoform X1 [Glycine soja]
GmaxZH038059	CYP71D10	0.136	0.092	0.347	0.223	0.276	0.629	1.239	0.774	0.854	3.335	3.35	3.609	XP_003545101.1 desmethyl-deoxy-podophyllotoxin synthase [Glycine max]
GmaxZH001926	CYP71D8	22.144	16.435	4.122	7.788	13.072	18.883	40.962	32.684	31.573	33.966	44.416	43.013	XP_003516584.1 cytochrome P450 71D8-like [Glycine max]
GmaxZH004046	CYP71D8	0.086	0.154	0.303	0.08	0.232	0.264	0.839	0.513	0.663	2	2.55	1.7	XP_003520239.1 cytochrome P450 71D8-like [Glycine max]
GmaxZH004047	CYP71D8	0.636	0.963	0.904	2.009	1.076	4.49	11.58	6.01	6.641	35.576	50.51	57.112	XP_028207651.1 cytochrome P450 71D8-like [Glycine soja]
GmaxZH027257	CYP71D8	1.004	1.045	0.662	1.015	0.471	2.887	15.768	7.426	4.151	26.943	33.79	36.606	XP_003537216.1 cytochrome P450 71D8-like [Glycine max]
GmaxZH027272	CYP71D8	0.161	0	0	0.111	0.001	0.843	0.551	0.758	0.946	1.39	0.638	1.402	XP_003535171.1 cytochrome P450 71D8-like [Glycine max]
GmaxZH029704	CYP71D8	0.433	0.6	1.605	3.425	0.959	9.857	23.759	12.369	9.118	48.04	71.759	92.305	XP_003537457.1 cytochrome P450 71D8-like [Glycine max]
GmaxZH029705	CYP71D8	4.783	2.713	9.188	6.378	3.488	21.026	50.411	32.429	34.855	136.125	128.175	187.169	NP_001304412.2 cytochrome P450 71D8 [Glycine max]
GmaxZH029706	CYP71D8	1.073	0.894	1.834	0.897	0.795	2.951	73.646	38.301	15.098	66.06	63.283	71.01	XP_028188552.1 cytochrome P450 71D8-like [Glycine soja]
GmaxZH048636	CYP71D9	0.306	0.206	0.72	1.539	0.759	1.256	21.084	8.353	4.91	32.21	24.235	36.239	XP_028213527.1 cytochrome P450 71D9 [Glycine soja]
GmaxZH007937	CYP72A68	0.911	0.409	1.104	3.1	1.121	2.168	2.868	4.134	4.598	9.082	4.542	6.108	XP_028226416.1 cytochrome P450 72A68-like [Glycine soja]
GmaxZH044956	CYP736A117	1.31	1.601	4.37	2.318	2.497	6.019	20.403	10.618	10.477	34.208	45.682	57.789	XP_003548205.1 cytochrome P450 736A117 [Glycine max]
GmaxZH011107	CYP75B2	0	0	0	0.035	0.033	0	0.098	0	0.071	0.179	0.519	0.836	KAG5027937.1 hypothetical protein JHK87_011451 [Glycine soja]
GmaxZH011108	CYP75B2	2.94	2.124	3.385	2.609	2.619	8.116	40.017	27.822	19.323	64.863	58.512	68.675	XP_003525450.1 flavonoid 3'-monooxygenase [Glycine max]
GmaxZH015308	CYP75B2	0.37	0.233	0.116	0.52	0.334	0.532	5.13	1.794	1.359	10.46	8.647	11.249	AAO47844.1 gray pubescence flavonoid 3'-hydroxylase [Glycine max]
GmaxZH036870	CYP76B6	0	0	0	0	0	0	0	0	0.04	0.561	0.232	0.199	XP_003543189.1 geraniol 8-hydroxylase [Glycine max]
GmaxZH023597	CYP81E1	5.08	4.319	6.834	5.866	5.275	11.377	50.05	30.332	23.577	119.567	141.35	168.895	XP_003533544.1 isoflavone 2'-hydroxylase [Glycine max]
GmaxZH041766	CYP81E1	1.169	1.246	5.706	4.996	1.286	15.237	41.161	18.321	14.648	91.251	102.554	166.401	NP_001241120.1 isoflavone 2'-hydroxylase-like [Glycine max]
GmaxZH029604	CYP81E8	0.568	0.728	1.497	1.862	1.319	1.834	13.701	7.104	5.567	42.598	34.378	51.676	XP_006590643.1 cytochrome P450 81E8 [Glycine max]
GmaxZH037053	CYP82A2	4.394	4.11	7.596	7.008	3.596	15.526	24.145	19.919	21.04	63.552	69.257	87.65	NP_001240077.1 cytochrome P450 82A2 [Glycine max]
GmaxZH042286	CYP82A2	0.511	0.388	1.635	4.417	0.745	2.463	46.407	17.492	9.834	117.967	123.963	247.191	XP_028202537.1 cytochrome P450 82A2-like [Glycine soja]
GmaxZH051039	CYP82A3	1.546	2.47	3.403	1.695	1.43	3.06	9.48	7.011	2.258	9.409	18.201	9.48	XP_003554074.1 cytochrome P450 82A3 [Glycine max]
GmaxZH030576	CYP83B1	11.948	8.789	4.688	13.508	12.288	15.693	21.588	17.119	17.036	20.872	21.232	18.031	XP_003538072.1 cytochrome P450 83B1 [Glycine max]
GmaxZH001820	CYP84A1	1.049	1.104	0.701	1.208	1.339	3.071	2.354	1.779	1.923	5.722	3.618	5.988	NP_001304427.2 cytochrome P450 84A1-like [Glycine max]
GmaxZH051068	CYP84A1	0.081	0.31	0.279	0.16	0.279	0.3	0.807	0.169	0.336	1.276	1.34	1.353	KAG4911586.1 hypothetical protein JHK86_052019 [Glycine max]
GmaxZH005735	CYP86A4	0.959	0.669	1.024	1.372	1.371	1.505	2.13	1.475	1.132	2.561	2.345	2.93	XP_028224001.1 cytochrome P450 86A8-like [Glycine soja]
GmaxZH002129	CYP88D6	0.551	1.09	0.37	1.312	1.266	1.884	4.858	2.007	2.951	9.18	9.014	4.498	XP_028245259.1 beta-amyrin 11-oxidase-like [Glycine soja]
GmaxZH007152	CYP93A1	5.79	7.864	18.035	8.974	4.943	15.307	44.932	31.527	21.16	95.597	121.41	139.641	XP_028225381.1 3,9-dihydroxypterocarpan 6A-monooxygenase [Glycine soja]
GmaxZH052471	CYP93A1	3.079	2.931	1.042	2.894	4.407	3.889	5.448	4.371	5.752	11.507	12.057	18.177	XP_006604384.1 3,9-dihydroxypterocarpan 6A-monooxygenase [Glycine max]
GmaxZH052452	CYP93A2	21.04	26.887	28.91	22.796	19.556	28.034	47.778	36.077	37.94	40.623	61.073	76.587	NP_001240973.1 cytochrome P450 93A2 [Glycine max]
GmaxZH019320	DMP2	3.128	4.074	3.706	2.47	3.267	4.914	19.29	13.224	13.094	19.058	25.892	21.714	NP_001236821.2 Protein DMP2-like [Glycine max]
GmaxZH037100	dnaJ	4.44	2.149	1.957	2.382	2.296	3.433	6.47	5.673	4.288	9.299	6.41	7.747	NP_001242058.2 DnaJ and 4Fe-4S dicluster domain-containing protein [Glycine max]
GmaxZH045071	DODA	24.752	23.94	30.826	16.839	16.352	28.829	131.69	101.974	58.65	122.283	167.002	159.441	XP_003548263.1 4,5-DOPA dioxygenase extradiol [Glycine max]
GmaxZH009487	DUR3	2.511	3.3	3.761	3.918	2.884	4.089	8.696	6.495	3.871	6.451	6.447	6.385	XP_003523904.1 urea-proton symporter DUR3 [Glycine max]
GmaxZH046066	DXR	12.242	14.067	13.241	9.499	8.893	11.72	30.93	26.8	19.335	25.022	35.214	37.557	XP_003549624.1 1-deoxy-D-xylulose 5-phosphate reductoisomerase, chloroplastic [Glycine max]
GmaxZH034604	F3H-3	2.913	5.549	4.651	3.397	2.721	3.989	35.317	6.367	4.788	10.369	10.258	8.231	XP_003543965.1 2-oxoglutarate-dependent dioxygenase 19 [Glycine max]
GmaxZH024253	FAD2-2	0.09	0.04	0	0.294	0.203	0.231	3.83	2.709	0.781	3.706	2.359	3.292	XP_028179966.1 omega-6 fatty acid desaturase, endoplasmic reticulum isozyme 2-like [Glycine soja]
GmaxZH035369	FMO1	0.271	0.548	0.266	0.349	0.214	0.418	13.019	5.636	0.59	0.494	4.519	1.832	XP_003541317.1 probable flavin-containing monooxygenase 1 [Glycine max]
GmaxZH036228	FMOGS-OX5	4.152	2.243	2.626	3.57	3.709	4.525	5.569	6.493	5.156	5.223	6.556	7.028	KAG5113503.1 hypothetical protein JHK82_036772 [Glycine max]
GmaxZH033213	FQR1	1.017	1.193	1.35	1.684	0.776	0.883	3.751	2.088	3.021	7.44	5.501	13.877	XP_006592527.1 NAD(P)H dehydrogenase (quinone) FQR1 [Glycine max]
GmaxZH033491	FQR1	0	0	0	0.071	0	0.078	0.406	0.301	0.074	1.035	0.286	0.955	XP_003540116.1 NAD(P)H dehydrogenase (quinone) FQR1 [Glycine max]
GmaxZH042813	GA2OX1	6.13	7.64	4.848	8.109	8.695	9.192	16.206	8.66	11.889	48.887	26.011	40.638	KAG4950352.1 hypothetical protein JHK86_043591 [Glycine max]
GmaxZH043484	GDH1	16.954	14.151	14.013	24.217	28.53	20.804	23.488	24.146	15.536	43.241	32.744	34.236	NP_001236404.1 glutamate dehydrogenase 1 [Glycine max]
GmaxZH044618	GDH1	0	0	0.162	0.039	0	0.042	0.367	0.531	0.638	2.205	1.704	1.951	XP_003548062.1 glutamate dehydrogenase 1 isoform X1 [Glycine max]
GmaxZH015699	GLR2.8	0	0	0	0	0	0	0.895	1.062	0.593	0	0.576	0	KAG5149350.1 hypothetical protein JHK82_016231 [Glycine max]
GmaxZH015229	GSTU9	30.334	49.83	38.615	31.512	20.623	44.926	292.65	295.264	87.147	198.257	347.85	306.904	NP_001238708.1 glutathione S-transferase GST 12 [Glycine max]
GmaxZH006036	GSVIVT00023967001	1.977	2.976	1.466	2.14	1.859	2.326	5.138	4.023	4.818	9.653	9.216	8.167	XP_003522119.1 peroxidase P7 [Glycine max]
GmaxZH038428	GSVIVT00023967001	1.472	0.68	2.718	1.673	2.541	1.334	10.723	1.071	5.751	21.007	19.462	15.851	XP_006595847.1 peroxidase P7 [Glycine max]
GmaxZH053624	GSVIVT00037159001	6.511	12.605	6.637	10.464	6.57	15.374	8.197	12.065	22.134	21.8	18.224	16.96	XP_003555769.1 peroxidase 5 [Glycine max]
GmaxZH043275	GULLO6	2.341	2.654	3.674	2.192	2.113	3.755	9.159	7.23	9.006	26.919	23.387	26.307	XP_003548184.1 probable L-gulonolactone oxidase 6 [Glycine max]
GmaxZH015968	hbdA	7.651	3.986	4.188	7.225	9.159	10.658	8.918	6.662	10.278	23.114	15.593	18.324	NP_001234958.1 peroxisomal 3-hydroxyacyl-CoA dehydrogenase-like protein [Glycine max]
GmaxZH004454	HSP26-A	4.758	8.028	7.616	5.465	7.387	11.142	44.69	28.92	24.573	62.209	54.806	63.761	NP_001234986.1 glutathione S-transferase GST 19 [Glycine max]
GmaxZH012577	HSP26-A	0.637	0.972	1.599	0.895	0.46	1.243	6.393	4.975	2.707	9.152	9.738	10.812	NP_001304625.1 probable glutathione S-transferase [Glycine max]
GmaxZH012578	HSP26-A	7.965	5.055	3.045	4.884	5.749	6.29	10.545	11.129	8.17	10.886	15.095	15.868	NP_001237698.1 glutathione S-transferase GST 20 [Glycine max]
GmaxZH018095	HSP26-A	5.046	2.331	3.259	4.537	7.657	7.282	26.601	16.632	4.517	23.373	22.976	26.711	NP_001238439.1 probable glutathione S-transferase [Glycine max]
GmaxZH018097	HSP26-A	2.145	5.24	9.853	3.239	2.627	3.969	37.816	27.706	6.856	29.671	38.727	44.364	KAG5037694.1 hypothetical protein JHK86_018534 [Glycine max]
GmaxZH018098	HSP26-A	3.732	2.608	2.278	4.595	4.616	3.833	5.71	5.468	5.007	8.119	6.418	8.8	XP_028240359.1 probable glutathione S-transferase isoform X2 [Glycine soja]
GmaxZH020638	HSP26-A	0.953	0.642	2.244	1.041	1.793	2.203	6.633	4.399	3.913	15.733	18.255	24.902	NP_001304557.1 probable glutathione S-transferase [Glycine max]
GmaxZH028094	HSP26-A	17.992	29.842	54.581	48.284	20.807	61.374	427.746	265.602	95.816	408.862	424.017	474.449	NP_001291444.1 glutathione S-transferase GST 15 [Glycine max]
GmaxZH049815	HSP26-A	0.389	0.349	0.254	0.666	0.35	0.399	1.15	0.643	0.754	1.319	1.153	2.184	NP_001237856.2 tau class glutathione S-transferase [Glycine max]
GmaxZH035987	IFS2	105.36	99.944	145.169	145.575	88.548	190.997	253.558	198.542	176.655	277.313	309.456	408.278	NP_001238515.2 2-hydroxyisoflavanone synthase precursor [Glycine max]
GmaxZH042172	INT2	11.839	5.945	7.228	12.406	11.793	11.308	16.075	12.493	8.871	19.236	21.562	26.099	NP_001348123.1 putative inositol transporter [Glycine max]
GmaxZH037450	ISPG	43.618	47.973	47.059	37.336	37.201	49.343	76.815	70.15	58.731	80.184	101.973	103.92	XP_003543457.1 4-hydroxy-3-methylbut-2-en-1-yl diphosphate synthase (ferredoxin), chloroplastic [Glycine max]
GmaxZH030256	ISPH	35.281	37.664	34.719	32.378	33.061	41.687	82.632	67.039	50.682	78.584	98.458	99.084	XP_003537898.1 4-hydroxy-3-methylbut-2-enyl diphosphate reductase, chloroplastic [Glycine max]
GmaxZH021734	KAT1	0.787	0.39	0.405	0.737	1.029	0.753	1.591	1.396	0.393	1.502	1.324	1.231	KAH1238252.1 Potassium channel KAT1 [Glycine max]
GmaxZH001177	LAC7	5.61	3.43	1.458	3.578	3.323	6.518	31.457	29.783	12.09	36.015	41.143	33.413	XP_003516921.1 laccase-7 isoform X1 [Glycine max]
GmaxZH006467	LAC7	14.227	13.375	10.26	8.056	11.801	17.951	96.346	84.408	59.939	141.542	123.53	113.207	XP_003520942.1 laccase-7 [Glycine max]
GmaxZH006468	LAC7	0.067	0.03	0	0.031	0.06	0.24	8.015	5.122	2.356	12.005	7.837	8.059	XP_003520941.2 laccase-7 [Glycine max]
GmaxZH002230	LDHA	0.618	0.97	0.565	1.06	0.743	1.533	6.401	2.341	1.143	19.438	12.503	17.176	XP_003517426.1 L-lactate dehydrogenase B [Glycine max]
GmaxZH051782	LHT1	1.711	0.409	0.567	2.278	1.956	2.694	23.506	19.512	5.876	44.738	32.096	56.768	XP_003553873.1 lysine histidine transporter 1 [Glycine max]
GmaxZH021326	LOX1.4	15.802	12.892	10.781	15.273	17.463	19.418	22.682	22.835	28.11	28.367	31.557	31.042	XP_003531597.1 seed linoleate 9S-lipoxygenase [Glycine max]
GmaxZH034538	LOX2.1	0.205	0.613	0.411	0.575	0.329	0.608	1.658	1.823	1.583	3.072	2.69	2.92	XP_003519005.1 linoleate 13S-lipoxygenase 2-1, chloroplastic [Glycine max]
GmaxZH008302	LOX3.1	7.923	7.123	3.511	6.545	6.393	8.677	14.336	12.627	10.652	12.151	13.467	12.371	KAH1259663.1 Linoleate 13S-lipoxygenase 3-1, chloroplastic [Glycine max]
GmaxZH043165	LOX3.1	15.017	12.934	9.22	14.001	16.365	15.623	35.675	31.265	20.187	27.567	28.015	30.782	XP_040866630.1 linoleate 13S-lipoxygenase 3-1, chloroplastic [Glycine max]
GmaxZH053603	LOX3.1	1.652	2.263	1.491	1.714	1.838	2.475	8.604	7.503	5.152	9.37	9.42	10.354	XP_003554800.1 linoleate 13S-lipoxygenase 3-1, chloroplastic [Glycine max]
GmaxZH050822	LRK10L-1.4	1.622	1.773	0.83	0.727	1.592	0.869	3.071	1.953	2.657	4.041	4.367	4.151	KHN17295.1 Putative receptor-like protein kinase [Glycine soja]
GmaxZH044857	LSI2	0.103	0.139	0.101	0.229	0.093	0.106	0.366	0.242	0.075	0.475	0.29	0.472	XP_028206060.1 silicon efflux transporter LSI2-like [Glycine soja]
GmaxZH012306	LYM2	26.199	22.597	18.993	22.332	25.928	22.946	52.217	42.127	30.787	57.286	63.329	69.141	KAH1250499.1 LysM domain-containing GPI-anchored protein 2 [Glycine max]
GmaxZH046026	maoI	4.894	4.187	2.675	2.784	6.391	4.101	7.945	6.892	9.535	8.521	6.919	12.682	XP_003550715.1 copper methylamine oxidase isoform X1 [Glycine max]
GmaxZH000058	MIOX2	0	0	0	0	0	0	4.185	9.769	2.985	17.904	14.827	8.747	NP_001241072.1 Inositol oxygenase 2-like [Glycine max]
GmaxZH004966	NHL6	1.032	2.837	2.784	2.597	2.387	4.638	16.579	10.207	4.175	21.045	20.635	23.832	ACU21028.1 unknown [Glycine max]
GmaxZH031311	NHL6	13.996	17.45	19.34	17.454	14.142	26.903	35.152	25.842	32.779	49.061	49.897	43.126	XP_003538353.1 NDR1/HIN1-like protein 6 [Glycine max]
GmaxZH040111	NHL6	12.818	9.784	8.902	15.037	18.152	25.875	37.738	29.866	27.964	45.702	46.848	51.941	XP_003544951.1 NDR1/HIN1-like protein 6 [Glycine max]
GmaxZH048335	NHL6	10.004	14.63	17.977	9.945	12.151	16.87	34.393	24.73	26.542	46.583	46.627	45.088	XP_003553153.1 NDR1/HIN1-like protein 6 [Glycine max]
GmaxZH036192	NQR	3.664	2.751	3.638	8.051	4.657	6.834	14.081	12.495	8.883	26.859	21.881	34.328	NP_001236028.2 NADPH:quinone oxidoreductase [Glycine max]
GmaxZH042569	OPR11	0.051	0.046	0.081	0.241	0.186	0.211	21.122	11.298	1.889	24.784	15.158	25.318	XP_028203329.1 putative 12-oxophytodienoate reductase 11 [Glycine soja]
GmaxZH047347	OPR11	0.047	0	0	0.044	0.17	0.048	0.042	0.14	0.091	0.595	0.398	0.546	KAH1119394.1 hypothetical protein GYH30_047974 [Glycine max]
GmaxZH035337	OPR3	0.163	0.073	0.032	0.381	0.477	0.418	3.576	2.895	0.236	2.369	1.64	3.883	KAG4970232.1 hypothetical protein JHK85_036653 [Glycine max]
GmaxZH016030	Os04g0338000	14.666	8.103	5.128	26.577	25.215	30.791	48.257	36.602	25.827	115.994	79.966	164.749	XP_003527296.1 probable aldo-keto reductase 2 [Glycine max]
GmaxZH031268	PARA	1.531	1.717	2.762	6.664	0.967	5.659	31.681	21.266	2.735	47.332	57.86	75.812	NP_001236587.1 tau class glutathione S-transferase [Glycine max]
GmaxZH040385	PDR1	1.11	0.936	0.781	1.777	1.584	2.222	9.87	6.294	3.386	20.473	18.564	25.585	XP_003546230.1 pleiotropic drug resistance protein 1 [Glycine max]
GmaxZH001973	PER10	0.632	0.309	0.901	0.323	1.14	0.472	6.939	6.247	4.496	7.249	3.609	5.097	XP_003517286.2 peroxidase 10 [Glycine max]
GmaxZH018892	PER10	15.854	10.746	9.734	26.281	24.642	38.812	24.592	26.76	25.954	83.75	49.958	65.786	XP_003529383.2 peroxidase 10 [Glycine max]
GmaxZH001422	PER52	3.361	3.758	1.859	4.643	4.028	6.054	14.242	7.736	12.612	31.772	23.41	18.599	XP_003517000.1 peroxidase P7 [Glycine max]
GmaxZH010549	PER52	1.965	2.145	2.584	7.012	6.519	2.018	5.425	6.407	6.207	25.008	19.578	32.631	XP_003523269.1 peroxidase P7 [Glycine max]
GmaxZH016173	PER52	3.312	0.818	2.373	7.866	14.341	0.69	3.795	7.595	2.921	19.574	16.57	17.27	XP_003527340.1 peroxidase P7 [Glycine max]
GmaxZH041510	PER54	23.882	13.417	18.473	22.771	17	23.082	42.861	31.824	37.416	76.912	41.251	93.172	XP_014623798.1 peroxidase A2 [Glycine max]
GmaxZH043620	PER55	22.36	19.693	12.66	17.293	22.43	30.796	47.282	38.475	39.787	43.366	54.598	48.388	KAG4940449.1 hypothetical protein JHK87_044320 [Glycine soja]
GmaxZH001424	PNC1	1.008	1.307	1.494	2.569	1.87	3.738	22.732	4.685	11.629	113.352	78.366	74.427	RZC29771.1 Cationic peroxidase 1 [Glycine soja]
GmaxZH004913	PNC1	6.545	3.406	1.985	4.841	14.546	14.912	21.888	19.362	18.859	60.714	29.715	62.758	XP_014624819.1 cationic peroxidase 1 [Glycine max]
GmaxZH006029	PNC1	0.375	0.673	1.262	0.652	0.145	0.881	9.699	3.049	3.127	27.894	17.553	14.077	XP_003522108.1 cationic peroxidase 1 [Glycine max]
GmaxZH006030	PNC1	0.515	0.416	1.173	0.434	0.279	1.059	11.447	4.937	4.791	22.503	15.525	14.321	XP_028224324.1 peroxidase P7-like isoform X1 [Glycine soja]
GmaxZH006031	PNC1	0	0.053	0.186	0.084	0.053	0	1.199	0.456	1.299	7.701	5.595	5.189	XP_006576455.1 peroxidase P7 [Glycine max]
GmaxZH006032	PNC1	0.057	0.051	0.089	0.079	0	0.176	1.594	0.125	1.082	7.984	4.755	5.1	XP_028224328.1 peroxidase P7-like [Glycine soja]
GmaxZH006033	PNC1	3.578	3.698	1.447	4.823	1.468	5.067	16.183	6.97	11.417	17.424	19.529	9.936	KAG5042219.1 hypothetical protein JHK87_006134 [Glycine soja]
GmaxZH006034	PNC1	5.57	5.8	4.957	5.39	4.24	9.846	25.027	15.204	17.595	34.462	30.953	31.107	XP_003522119.1 peroxidase P7 [Glycine max]
GmaxZH025893	PNC1	1.028	0.874	3.228	0.912	0.879	0.889	6.107	11.668	6.64	24.857	13.911	24.016	XP_003534655.2 cationic peroxidase 1 [Glycine max]
GmaxZH030970	PNC1	1.615	0.187	0.531	0.536	1.975	5.135	9.578	7.005	6.088	22.706	17.246	27.209	XP_003538325.1 cationic peroxidase 1 [Glycine max]
GmaxZH040051	PNC1	1.174	0.916	0.28	1.147	3.825	3.042	6.033	2.979	5.031	16.409	8.046	18.617	KAG4963942.1 hypothetical protein JHK86_040810 [Glycine max]
GmaxZH048406	PNC1	0.69	0.664	0.89	0.554	1.113	2.532	11.653	7.998	3.43	16.375	9.113	19.379	XP_003551179.1 cationic peroxidase 1 [Glycine max]
GmaxZH050030	PNC1	2.93	2.983	8.753	4.748	3.865	5.497	14.313	13.537	10.938	48.625	34.665	54.991	XP_003552297.1 cationic peroxidase 1 [Glycine max]
GmaxZH050031	PNC1	0	0	0.053	0.063	0.182	0	0.12	0.267	0.065	1.178	1.454	1.95	XP_003552299.1 cationic peroxidase 1 [Glycine max]
GmaxZH046664	PUP11	0.929	0.789	1.112	1.007	0.97	1.606	2.474	2.368	2.643	7.259	4.446	6.882	XP_003550935.1 probable purine permease 11 [Glycine max]
GmaxZH050467	pvadh	0.036	0	0	0.034	0	0.037	0.064	0.144	0.14	0.599	0.272	1.716	KHN13641.1 Quinohemoprotein ethanol dehydrogenase type-1 [Glycine soja]
GmaxZH006538	RBL1	12.956	12.772	18.717	12.358	12.495	15.461	29.752	23.698	20.233	43.143	37.252	42.212	XP_003520922.1 RHOMBOID-like protein 1 [Glycine max]
GmaxZH014928	RBOHC	16.103	10.098	5.943	18.047	18.31	20.57	23.035	20.782	18.29	32.106	23.135	26.35	XP_003526909.1 respiratory burst oxidase homolog protein C [Glycine max]
GmaxZH021219	SAUSA300_0825	2.482	2.654	4.268	6.329	3.813	5.206	7.881	5.065	2.091	7.434	6.835	10.34	XP_003531543.1 probable nitronate monooxygenase [Glycine max]
GmaxZH018662	SQE1	6.646	9.711	13.349	12.267	15.097	16.002	17.213	18.395	13.729	26.334	27.38	18.851	XP_003529275.1 squalene monooxygenase SE1 isoform X2 [Glycine max]
GmaxZH003748	SRG1	2.375	0.942	0.433	2.896	2.592	6.24	43.57	35.502	10.403	29.172	38.287	51.464	XP_014622262.1 protein SRG1 [Glycine max]
GmaxZH012346	SRG1	1.015	0.336	0.21	0.75	1.446	0.823	1.234	0.687	1.083	3.889	1.603	3.555	KAH1250554.1 Protein SRG1 [Glycine max]
GmaxZH042281	STP7	11.516	13.318	12.804	10.626	12.334	13.724	35.462	24.336	19.328	18.548	30.233	28.692	XP_003546610.1 sugar transport protein 7 [Glycine max]
GmaxZH012653	TanjilG_01206	0	0.253	0.037	0.22	0.382	0.435	1.171	0.279	0.909	8.727	6.18	2.315	KAH1134839.1 hypothetical protein GYH30_012919 [Glycine max]
GmaxZH028287	TEFS1	53.137	38.185	31.357	69.58	43.805	68.138	158.862	126.558	72.816	127.096	144.323	142.217	XP_003536362.1 elongation factor 1-alpha-like [Glycine max]
GmaxZH032384	TR	3.177	1.098	1.934	2.308	1.137	3.544	10.071	9.965	9.522	47.73	30.781	41.58	KAG5139486.1 hypothetical protein JHK84_033254 [Glycine max]
GmaxZH032385	TR	0.471	0.06	0.264	0.945	0.364	0.553	2.091	2.128	2.144	9.99	4.163	8.303	KAG4967208.1 hypothetical protein JHK87_032859 [Glycine soja]
GmaxZH032386	TR	5.559	2.03	0.945	3.468	5.5	6.983	7.752	3.73	8.613	26.672	20.314	32.71	KAG5118505.1 hypothetical protein JHK82_032925 [Glycine max]
GmaxZH044579	VAS	4.416	1.809	5.047	3.236	5.719	5.719	10.575	6.456	3.802	10.533	10.086	11.575	XP_003548041.1 non-specific lipid transfer protein GPI-anchored 30 [Glycine max]
GmaxZH034600	WAK2	8.779	6.165	3.965	4.899	10.583	8.256	38.648	12.593	15.333	36.596	35.54	31.656	XP_028196648.1 uncharacterized protein LOC114381577 [Glycine soja]
GmaxZH009069	YUC6	2.012	1.445	2.017	1.758	2.058	1.515	2.88	2.631	1.771	4.189	2.915	3.903	XP_003522685.1 indole-3-pyruvate monooxygenase YUCCA6 [Glycine max]
GmaxZH014163	YUC6	2.4	1.752	1.18	3.686	3.957	1.61	4.349	4.209	2.535	4.816	3.062	4.784	XP_003527821.1 indole-3-pyruvate monooxygenase YUCCA6 [Glycine max]

## Sheet: Table S10
Table S10. Top 20 enriched KEGG pathways of 647 DAMs.
Pathway ID	Name	Num.	p-value	Class	Descrption
ko00440	Phosphonate and phosphinate metabolism	2	0.0541627	Metabolism	Phosphonate and phosphinate metabolism
ko00760	Nicotinate and nicotinamide metabolism	6	0.0574255	Metabolism	Nicotinate and nicotinamide metabolism
ko00410	beta-Alanine metabolism	5	0.0583572	Metabolism	beta-Alanine metabolism
ko00944	Flavone and flavonol biosynthesis	5	0.0874591	Metabolism	Flavone and flavonol biosynthesis
ko00941	Flavonoid biosynthesis	10	0.089998	Metabolism	Flavonoid biosynthesis
ko00232	Caffeine metabolism	4	0.0904964	Metabolism	Caffeine metabolism
ko00996	Biosynthesis of various alkaloids	4	0.134297	Metabolism	Biosynthesis of various alkaloids
ko00460	Cyanoamino acid metabolism	3	0.142969	Metabolism	Cyanoamino acid metabolism
ko00260	Glycine, serine and threonine metabolism	5	0.209036	Metabolism	Glycine, serine and threonine metabolism
ko00230	Purine metabolism	6	0.224351	Metabolism	Purine metabolism
ko00562	Inositol phosphate metabolism	1	0.233546	Metabolism	Inositol phosphate metabolism
ko04070	Phosphatidylinositol signaling system	1	0.233546	Environmental Information Processing	Phosphatidylinositol signaling system
ko07227	Histamine H2/H3 receptor agonists/antagonists	1	0.233546	Drug Development	Histamine H2/H3 receptor agonists/antagonists
ko00943	Isoflavonoid biosynthesis	5	0.258051	Metabolism	Isoflavonoid biosynthesis
ko00943	Biosynthesis of alkaloids derived from histidine and purine	5	0.258051	Metabolism	Biosynthesis of alkaloids derived from histidine and purine
ko00950	Isoquinoline alkaloid biosynthesis	5	0.3095	Metabolism	Isoquinoline alkaloid biosynthesis
ko01120	Microbial metabolism in diverse environments	22	0.315908	Metabolism	Microbial metabolism in diverse environments
ko00250	Alanine, aspartate and glutamate metabolism	3	0.316875	Metabolism	Alanine, aspartate and glutamate metabolism
ko00130	Ubiquinone and other terpenoid-quinone biosynthesis	2	0.332363	Metabolism	Ubiquinone and other terpenoid-quinone biosynthesis
ko02010	ABC transporters	11	0.335984	Environmental Information Processing	ABC transporters

[truncated: 2 more sheets: Table S11, Table S12]
